# Title | Quantitatively mapping local quality of super-resolution microscopy by rolling Fourier ring correlation

**Authors** | Weisong Zhao<sup>1,8,13</sup>✉, Xiaoshuai Huang<sup>2,10,13</sup>, Jianyu Yang<sup>3,13</sup>, Guohua Qiu<sup>4</sup>, Liying Qu<sup>1</sup>, Yue Zhao<sup>5</sup>, Shiqun Zhao<sup>4</sup>, Ziying Luo<sup>4</sup>, Xinwei Wang<sup>1</sup>, Yaming Jiu<sup>6</sup>, Heng Mao<sup>7</sup>, Xumin Ding<sup>1</sup>, Jiubin Tan<sup>8</sup>, Ying Hu<sup>9</sup>, Leiting Pan<sup>3</sup>✉, Liangyi Chen<sup>4,11,12</sup>✉ & Haoyu Li<sup>1,8</sup>✉

## Affiliations

<sup>1</sup>Innovation Photonics and Imaging Center, School of Instrumentation Science and Engineering, Harbin Institute of Technology, Harbin 150080, China.

<sup>2</sup>Biomedical Engineering Department, Peking University, Beijing 100191, China.

<sup>3</sup>The Key Laboratory of Weak-Light Nonlinear Photonics of Education Ministry, School of Physics and TEDA Institute of Applied Physics, Frontiers Science Center for Cell Responses, Nankai University, Tianjin 300071, China.

<sup>4</sup>State Key Laboratory of Membrane Biology, Beijing Key Laboratory of Cardiometabolic Molecular Medicine, Institute of Molecular Medicine, National Biomedical Imaging Center, Center for Life Sciences, School of Future Technology, Peking University, Beijing 100871, China.

<sup>5</sup>Department of Control Science and Engineering, Harbin Institute of Technology, Harbin 150001, China.

<sup>6</sup>Unit of Cell Biology and Imaging Study of Pathogen Host Interaction, The Center for Microbes, Development and Health, Key Laboratory of Molecular Virology and Immunology, Institut Pasteur of Shanghai, Chinese Academy of Sciences, Shanghai 200031, China.

<sup>7</sup>School of Mathematical Sciences, Peking University, Beijing 100871, China.

<sup>8</sup>Key Laboratory of Ultra-Precision Intelligent Instrumentation of Ministry of Industry and Information Technology, Harbin Institute of Technology, Harbin 150080, China.

<sup>9</sup>School of Life Science and Technology, Harbin Institute of Technology, Harbin 150001, China

<sup>10</sup>International Cancer Institute, Peking University, Beijing 100191, China.

<sup>11</sup>Beijing Academy of Artificial Intelligence, Beijing 100871, China.

<sup>12</sup>PKU-IDG/McGovern Institute for Brain Research, Beijing 100871, China.

<sup>13</sup>These authors contributed equally to this work.

✉Correspondence to: [lihaoyu@hit.edu.cn](mailto:lihaoyu@hit.edu.cn), [lychen@pku.edu.cn](mailto:lychen@pku.edu.cn), [plt@nankai.edu.cn](mailto:plt@nankai.edu.cn), [weisongzhao@hit.edu.cn](mailto:weisongzhao@hit.edu.cn)

**ABSTRACT | In fluorescence microscopy, computational algorithms have been developed to suppress noise, enhance contrast, and even enable super-resolution (SR). However, the local quality of the images may vary on multiple scales, and these differences can lead to misconceptions, which is especially intractable in emerging deep-learning ones. Current mapping methods fail to finely estimate the local quality, challenging to associate the SR scale content. Here, we develop a rolling Fourier ring correlation (rFRC) framework to evaluate the reconstruction uncertainties down to SR scale. To visually pinpoint regions with low reliability, a filtered rFRC is combined with a modified resolution scaled error map (RSM), offering a comprehensive and concise map for further examination. We demonstrate their performances on various SR imaging modalities, and the resulting quantitative maps enable better SR images integrated from different reconstructions. Beyond that, we provide a strategy for learning-based restorations, allowing a direct detection of both data and model uncertainties, and expect the representative cases can inspire further advances in this rapidly developing field.**

By implementing fluorescent probes and combining specific excitation and emission protocols, super-resolution (SR) fluorescence microscopy breaks the diffraction limit of resolution<sup>1</sup>, in which many methods heavily depend on image calculation and processing that retrieve SR information<sup>1, 2</sup>. Intrinsically, the noise and distortions in raw images caused by the photophysics of fluorophores<sup>3-5</sup>, the chemical environment of the sample<sup>3, 4, 6</sup>, and the optical setup conditions<sup>4, 7-10</sup>, may influence the qualities of the final SR images<sup>11-13</sup>. Because these factors are related to specific experimental configurations, a reliable and reference-free estimation of the image quality is invaluable to subsequent analysis, especially at the SR scale.

To evaluate the global effective resolution in situ, the Fourier ring correlation (FRC)<sup>14</sup> describes the highest reliable cut-off frequency of an image. This effective resolution, or equivalently the spectral signal-to-noise ratio (SNR), is one crucial SR image quality metric, reflecting the authentic resolvability or the uncertainty<sup>15</sup>. However, the local resolution may vary dramatically over the imaging field. For example, in single-molecule localization microscopy (SMLM)<sup>16-18</sup>, the practical resolutions at different local regions are generally determined by the corresponding molecule active intensity and density, as well as the local background level<sup>11</sup>. To measure this resolution heterogeneity, the block-wise FRC calculation<sup>14, 19</sup> was introduced, but it is still too coarse to describe the SR scale spatial separation of the resolution variation. The upscaled resolvability of SR imaging requires a more elaborate evaluation.

Here, we propose a rolling Fourier ring correlation (rFRC) method to draw the resolution heterogeneity directly in the SR domain, which allows for a mapping at an unprecedented SR scale and seamlessly correlates

58 the resolution map with the SR content. Moreover, the variations of different SR reconstruction methods are  
59 usually on a fine scale, and our rFRC provides a prerequisite for assessing these methods objectively. Thus, it  
60 enables advancing process procedures to improve image restoration quality, such as fusing SMLM images  
61 reconstructed by different algorithms to yield SR images with better quality. Although we are limited to  
62 calculate the errors as without ground-truth comparing, we can measure the uncertainties by this rFRC to  
63 uncover the errors contained in the corresponding SR images. In other words, the lower spectral SNR  
64 (effective resolution) gives a higher probability of the error existence<sup>15</sup>, and thus we can use it to represent the  
65 uncertainty revealing the error distribution.

66 As a model-independent assessment, the rFRC using two independent captures may fail to identify regions  
67 that were always incorrectly restored during different reconstructions, possibly due to systematic image  
68 processing bias (model bias). On the other hand, the resolution-scaled error map (RSM)<sup>19</sup> can evaluate  
69 reconstruction errors against the simultaneously acquired high SNR wide-field reference, assuming a spatially  
70 invariant Gaussian kernel and homogenous illumination. However, RSM suffers from false-negative  
71 identifications when the assumptions fail, and its detectable error scale is limited by the diffraction barrier. In  
72 this sense, RSM can only estimate the large-scale errors, such as the complete absence and distortion of  
73 structures, possibly induced by model bias, which can be a complementary module. We also accompany our  
74 rFRC with a truncated RSM, namely PANEL (pixel-level analysis of error locations), pinpointing the regions  
75 with low reliability for subsequent biological profiling.

76 We applied our quantitative maps in many SR approaches, including SMLM, SR radial fluctuations  
77 (SRRF)<sup>20</sup>, structured illumination microscopy (SIM)<sup>21</sup>, and deconvolution<sup>22, 23</sup> (**Supplementary Note 2-5**),  
78 demonstrating its effectiveness. Beyond that, we explored that our rFRC can also be applied to evaluate the  
79 local restoration qualities of the deep-learning methods. At present, the importance of reconstruction  
80 uncertainty is attracting more attentions, as the out-of-distribution tests leading to hallucinations far from the  
81 truth. Based on rFRC mapping, we offer an effective solution for both data uncertainty and model uncertainty  
82 estimation. To study the special mechanism of the model and data uncertainties, we designed a simulated  
83 experiment with intentionally induced model uncertainty, and we found a large increase in detected data  
84 uncertainty, indicating the leakage of model uncertainty. This phenomenon suggests that the data uncertainty  
85 may be even more crucial for deep-learning microscopies. Finally, for expecting our method can be a routinely  
86 used local quality evaluation tool, it has been implemented as an open-source framework; the related source  
87 codes and the out-of-the-box Fiji/ImageJ<sup>24</sup> plugin are available on GitHub (**Methods**).

## 88 RESULTS

89 **The rFRC mapping and PANEL pinpointing.** To provide local quality measurements directly at the SR  
90 scale, we transformed the conventional FRC into a rolling FRC (rFRC) map (**Fig. 1a, Methods**). The rFRC  
91 calculation is similar to that of a moving filter on an image. We assigned the corresponding FRC resolution in  
92 each block by sliding a window through the image. (i) To calculate the FRC of pixels at the image boundaries,  
93 we padded the input image symmetrically around a half size of the block (Step 1, **Fig. 1a**). (ii) To eliminate  
94 background-induced false negatives, we avoided calculating areas indistinguishable from the background  
95 (**Methods, Supplementary Fig. 2**), in which we assigned calculated the FRC resolution to the center pixel of  
96 each block only if its mean intensity was larger than a given threshold (Steps 2-4, **Fig. 1a**). To avoid  
97 overconfident and unstable determinations from small image blocks, in this work we used the  $3\sigma$  curve<sup>25</sup> as  
98 criterion (**Methods, Supplementary Note 1.1**). (iii) Afterward, the same procedure was repeated block by  
99 block throughout the entire image. Using the above rFRC as the metric we can quantitatively map the  
100 uncertainties in the SR reconstructions at their SR scale (**Supplementary Note 1.2**). We also offer two  
101 colormaps that may be more suitable for human intuition<sup>26</sup> to display the uncertainties (shifted Jet, sJet; and  
102 black Jet, bJet) (Step 5, **Fig. 1a, Methods, Supplementary Fig. 3a**). In addition to local quality assessment,  
103 we calculate two global metrics, the rFRC value, a dimensionless metric with values starting at 0 reflecting  
104 the deterioration rate across the imaging field, and the rFRC resolution, representing the averaged resolution  
105 (**Methods**).

106 In addition, we realized that the rFRC may not identify the regions that were always incorrectly restored  
107 during different reconstructions due to the model bias. For example, if the two reconstructed images lost an  
108 identical component, the rFRC may indicate a false positive in the corresponding region. To moderate this  
109 issue, we combined a modified RSM (**Methods, Supplementary Fig. 4**) with our rFRC to constitute the  
110 PANEL (**Fig. 1b, Methods**), for pinpointing such regions with low reliability. As small intensity fluctuations  
111 can lead to potential false negatives, we truncated the RSM with a hard threshold (0.5, **Methods**), only  
112 including prominent artifacts such as misrepresentations or the disappearance of structures. To filter the  
113 regions with high quality (high FRC resolution), we adopted the Otsu-based<sup>27</sup> segmentation to highlight  
114 regions giving a higher probability of the error existence (**Methods, Supplementary Fig. 3b**). We then merged  
115 the filtered rFRC map (green channel) and RSM (red channel) to create the composite PANEL map (**Fig. 1b**).  
116 Note that our PANEL cannot fully pinpoint the unreliable regions induced by the model bias at present, which  
117 would require more extensive characterization and correction routines based on the underlying theory of the

118 corresponding models<sup>10, 28-30</sup>.

119  
120 **Validating with simulations.** To test our quantitative maps with known ground truth, we used simulated  
121 datasets of SMLM from the EPFL challenge<sup>11</sup> (**Methods**). These datasets consisted of high-density (HD, 361  
122 frames) and low-density (LD, 12000 frames) emitters per frame to simulate excessively low or optimal  
123 illumination intensity conditions. The images were divided into two statistically independent subsets, yielding  
124 two SR reconstructions obtained using the maximum likelihood estimation (MLE)<sup>31</sup>, for our rFRC mapping  
125 (**Methods**, 4<sup>th</sup> column in **Fig. 1c**). Between MLE reconstructions and ground-truth images, their differences  
126 in space indicate the locations and scales of different artifacts (first two columns in **Fig. 1c**). From this spatial  
127 difference and localization uncertainty maps (**Supplementary Fig. 5a, 5b**), we found that the reconstructed  
128 SR image under the HD condition was much more blurred than that of the LD condition, possibly due to more  
129 overlapping emitters being excited simultaneously. This was exactly affirmed by the larger rFRC value  
130 (**Methods**) of the HD-MLE image than that of the LD-MLE image (0.66 versus 0.16, **Fig. 1c**), in which the  
131 rFRC map uncovered all the subtle errors (as pointed by white arrows, 4<sup>th</sup> column in **Fig. 1c**). In contrast, the  
132 previous RSM cannot detect such subtle errors, and is influenced by noise-induced random intensity  
133 fluctuations (3<sup>rd</sup> column in **Fig. 1c**). On the other hand, we note that rFRC failed to detect the filament's  
134 missing part, mimicking defective local illumination or labeling (cyan arrows, **Fig. 1c**). That was revealed by  
135 the filtered RSM, highlighting the necessity of PANEL combination for pinpointing different types of errors  
136 (last column in **Fig. 1c**).

137 To demonstrate the dependence of the SMLM reconstruction quality on the illumination intensity, we  
138 synthesized a regular grid illuminated by a Gaussian beam with high power in the center and low power toward  
139 the edges (**Methods, Supplementary Fig. 5c, 5d**). Under this circumstance, molecule blinkings at the center  
140 were better separated temporally than those at the edges<sup>19</sup> (1<sup>st</sup> column in **Fig. 1d, Supplementary Fig. 5d**),  
141 which was clearly revealed on the rFRC map (4<sup>th</sup> column in **Fig. 1d**, 29 nm at the center and 80 nm at the  
142 edge). In contrast, because the space-invariant reconstructed PSF assumption did not hold up here, RSM  
143 provided incorrectly estimated errors (3<sup>rd</sup> column in **Fig. 1d**, 0.40 a.u. at the center and 0.17 a.u. at the edge,  
144 **Supplementary Fig. 5e**), and it was opposite to the reference (2<sup>nd</sup> column in **Fig. 1d**, 0.75 a.u. at the center  
145 and 1.00 a.u. at the edge).

146 Although the RSM is incompatible with volumetric datasets, the rFRC can be directly extended to a 3D  
147 version when applying plane-by-plane calculations (**Methods**). Here, we presented the simulated 3D dataset  
148 from the EPFL SMLM challenge<sup>32</sup>, including both LD and HD emitters (**Methods, Supplementary Fig. 6**).

149 Similarly, compared to the reconstruction with LD emitters per frame, rFRC analysis demonstrated lower  
150 quality with HD emitters (3D rFRC value *LD*: 2.2, *HD*: 4.5, **Supplementary Fig. 6b**), confirming the real  
151 experimental experience.

152  
153 **Evaluating resolution heterogeneity of localization microscopy.** Next, we examined the experimental  
154 SMLM microtubule datasets (**Methods, Fig. 2a, Supplementary Fig. 7**). As visualized by the rFRC, the SR  
155 microtubule images obtained by large-field STORM<sup>33</sup> (**Fig. 2a, left**), small-field SMLM<sup>11</sup> (**Supplementary**  
156 **Fig. 7a, 7b**), and SRRF<sup>20</sup> (**Supplementary Fig. 7c**) demonstrated significantly lower resolutions at filament  
157 intersections (right at **Fig. 2a, Supplementary Fig. 7**) and perinuclear region of the cell (right at **Fig. 2a**).  
158 This is because the regions with more complex structures will exhibit more simultaneous emitters per area,  
159 inducing a relatively degraded resolution. In detail, as can be seen in **Fig. 2b**, the perinuclear region contains  
160 the most dense cytoskeleton, and its surrounding region is the transitional subregion with the microtubules  
161 becoming sparser. The peripheral subregion is further out, which exists in the thin perimeter areas of the cell<sup>34</sup>,  
162 and the microtubules appear as an expansive network. Interestingly, such three-stage structural distribution-  
163 induced resolution heterogeneity is successfully mapped by our rFRC (right at **Fig. 2a, Fig. 2b**). Overall, these  
164 rFRC maps offered a more intuitive interpretation for the real resolutions of the corresponding images from  
165 localization microscopy.

166  
167 **Optimal fusion of SMLM.** Since all current reconstruction algorithms assume homogenous HD or LD  
168 emitters per frame, the heterogeneity of resolution is becoming a major problem<sup>19</sup>. By identifying positions of  
169 high localization uncertainty with rFRC map, we can compare the local performances of different restoration  
170 algorithms, and fuse different regional reconstructions (**Methods, Fig. 2c**). To do so, the resolution  
171 heterogeneity and potential artifacts can be minimized. By integrating a high-density simulated dataset  
172 reconstructed by the multi-emitter MLE (ME-MLE)<sup>31</sup> and the FALCON (fast localization algorithm based on  
173 a continuous-space formulation)<sup>35</sup>, the fused image demonstrated better PSNR (peak signal to noise ratio),  
174 SSIM (structural similarity), and rFRC values (**Supplementary Fig. 5f-5i**). To further evaluate its  
175 performance in real samples, we analyzed immunolabeled  $\alpha$ -tubulin filaments in fixed COS-7 cells imaged  
176 with 2D-STORM and restored them with either the ME-MLE or single-emitter Gaussian fitting<sup>33</sup> (SE-  
177 Gaussian) (**Methods, Fig. 2d**). Although the ME-MLE method performed better at approximating complex  
178 structures (HD emitters) and provided a lower overall rFRC value, the SE-Gaussian algorithm seemed to excel  
179 in reconstructing some simple structures (LD emitters) (**Fig. 2d, 2e**). By combining regions with the lowest



180 local rFRC values between reconstructions from either of the two algorithms (**Methods**), the new composite  
181 SR image demonstrated better visual quality and the lowest overall rFRC value (0.96 versus 1.26 and 4.14,  
182 **Fig. 2d**). Moreover, the fused image exhibited a more homogenous distribution of spatial resolution than that  
183 obtained either by ME-MLE or SE-Gaussian alone (**Fig. 2f, 2g**), reinforcing its superior performance in the  
184 entire FOV. Specifically, this rFRC map-guided image fusion led to a substantially improved resolution (the  
185 inset in **Fig. 2g**) in replaced regions than the SE-Gaussian method ( $80.55 \pm 1.52$  nm, hollow), and significant  
186 increases in local resolutions than the ME-MLE method ( $4.28 \pm 0.14$  nm, white solid). In contrast, because  
187 the RSM method was incapable of revealing errors of SR ranges, it failed to identify such intricate structures  
188 from the STORM image (**Fig. 2h**).

189 Similarly, the rFRC was used to composite fusion to clathrin-coated pits (CCPs) in COS-7 cells under  
190 2D-STORM. The merged SR image showed better quality and higher mean resolution (**Supplementary Fig.**  
191 **8**). Beyond that, we further provided the rFRC map procedure for the 3D-STORM<sup>33</sup> reconstruction  
192 (**Supplementary Fig. 9a**), in which significant uncertainties also occurred at interweaved filaments  
193 (**Supplementary Fig. 9b-9d**). Under this 3D configuration, the overall most accurate axial planes for  
194 microtubule (**Supplementary Fig. 9d, 9e**) and actin filaments (**Supplementary Fig. 9f-9k**) were located at  
195 the focal planes.

196  
197 **Evaluating diverse optical super-resolution microscopies.** After establishing the validity and superiority of  
198 our method in SMLM, we extended our analysis to other non-pointillism SR methods. In theory, because the  
199 weight of the optical transfer function (OTF) decreases gradually with its spatial frequency, the noise will  
200 dominate the high-frequency components while the low-frequency deep inside the OTF support remains stable.  
201 The subsequent reconstructions will apply more amplifications at higher frequencies than lower ones, leading  
202 to significant fluctuations in high-frequency components, which renders intricate structures more profoundly  
203 affected by noise. Moreover, the variations of different SR reconstruction methods are usually on their SR  
204 scale, and thus an evaluation on the corresponding level is essential. Here, our rFRC offers a well-timed  
205 solution to detect these uncertainties at high spatial frequencies.

206 Hessian-SIM<sup>36</sup> using the Hessian matrix continuity on the Wiener-SIM<sup>37</sup> results to reduce random, non-  
207 continuous artifacts induced by the live-cell low SNR imaging conditions. We applied the rFRC map to  
208 differentiate such subtle variations in fidelity between conventional Wiener-SIM and Hessian-SIM (rFRC  
209 value, 1.36 versus 1.24) (**Methods, Supplementary Note 2**), and in contrast, the RSM detected identical  
210 qualities (RSE value, 0.27 versus 0.27). Richardson-Lucy (RL) deconvolution<sup>22, 23</sup> has been well applied in

many optical microscopes<sup>13</sup> to improve the image contrast, deblurring the estimate of sample density with each iteration. However, the RL deconvolution may amplify noise under excessive iterations, and thus require back-and-forth visual inspection for iteration determination. With a finer assessment, we used rFRC map to moderate this challenge in two aspects. First, we applied RL deconvolution to process the total internal reflection fluorescence (TIRF) image and then calculated its corresponding rFRC value of each iteration to determine the optimal iteration times objectively (**Supplementary Note 3.1**). Second, we performed RL deconvolution with excessive iterations on a simulated wide-field image, in which the amplified noise induced snowflake-like artifacts. To adaptively filter the high-frequency artifacts, we used local cutoff frequencies determined by the rFRC map to low-pass filter various block-box areas within the entire image, producing optimal quality against the global filter (**Supplementary Note 3.2**). Finally, we even employed our evaluation on coherent imaging reconstructions, and obtained an accurate quality rating map contrasted to ground-truth, pinpointing all subtle untrustworthy regions (**Supplementary Note 4**).

**The model and data uncertainties in learning-based applications.** Characterizing the uncertainty of the corresponding network representations is crucial for further quantitative analysis. The Bayesian neural network (BNN) framework<sup>38</sup> can be trained to obtain the uncertainties by learning the distribution overweight (**Supplementary Note 7.2**), and two types of uncertainty are defined in its concept, i.e., the data uncertainty and the model uncertainty. Generally, the data uncertainty is induced by the combined effects of noise or sampling, and the model uncertainty is caused by the existing distance between the established model and its real-world counterpart. Drawing on approximate implementations of BNN<sup>38, 39</sup>, in several learning-based microscopies, the data and model uncertainties can be measured by modifications to the original training procedures and network architecture<sup>40-44</sup>. Notably, the data uncertainty is learned and predicted by the network itself using distributional approximations<sup>40-42, 44</sup>. Thus it is hard to ensure the stability and rationality of the obtained data uncertainty<sup>44</sup>, and these modifications may compromise the network performance.

In optical SR modalities, we have shown how the rFRC mapping (from two independent captures) model-independently measured the data uncertainties with no need for modifications. When considering the learning-based restorations, we also envisage that the model uncertainty can be directly detected by the ensemble disagreement<sup>39</sup> of independently training repeated models on the same dataset with multiple random initializations and optimizations<sup>43</sup>. By applying the rFRC map to two predictions from two inputs (data sampling) and two models (network training), respectively, we can monitor both the data uncertainty and the model uncertainty (**Supplementary Note 7.2**). To test our strategy, two deep neural networks ( $f_A$  and  $f_B$ ) were



242 trained independently, with high-resolution images (120 nm PSF) as ground-truth and corresponding low-  
243 resolution (240 nm PSF) as input (**Fig. 3a-3e**). When we supplied input images of different resolutions, this  
244 represented out-of-distribution data since the image transformations were specific to the 120 nm PSF and 240  
245 nm PSF data pair. Therefore, to artificially increase the potential model uncertainty, we created 300 nm PSF  
246 images as the out-of-distribution test data.

247 *Data uncertainty evaluated by rFRC (Data rFRC)*. Here we sampled the input image twice ( $I_1$  and  $I_2$ ),  
248 yielding two corresponding SR reconstructions ( $f_A(I_1)$  vs.  $f_A(I_2)$ ) from the same model ( $f_A$ ) (**Fig. 3f, 3g**). The  
249 result from 240 nm PSF input (240-result) has a rather small rFRC resolution distribution, indicating a high-  
250 quality SR reconstruction (**Fig. 3f**). On the other hand, upon inputting the out-of-distribution data, i.e., 300  
251 nm PSF, the result (300-result) contained much more hallucinations, such as smooth filaments became broken  
252 pieces due to the enlargement of structures by the 300 nm PSF (**Fig. 3e**). This is highlighted by the 'Data rFRC'  
253 mapping demonstrating lower resolution distribution, especially at the intersections of the filaments (**Fig. 3g**).

254 Notably, because the deep models have no stationary form with only learning the representations of  
255 training data, the model uncertainty and data uncertainty will be not mutually exclusive<sup>38</sup>. Compared to the  
256 correct (in-distribution) input data, the predictions from the out-of-distribution input data are more sensitive  
257 to noise or other potential influences, leading the predictions more prone to fluctuations. Therefore, the model  
258 uncertainty can leak into the data uncertainty<sup>38</sup>, which allows our rFRC to indirectly detect the leaked model  
259 uncertainty from the data uncertainty (see also another univocal example in **Supplementary Note 7.1**).  
260 Although our rFRC method only examined pure data uncertainty in **Fig. 3f** and **3g**, we successfully appreciated  
261 the potential hallucinations induced by the out-of-distribution data, explicitly showing the leakage of model  
262 uncertainty into the data uncertainty.

263 *Model uncertainty evaluated by rFRC (Model rFRC)*. To detect the model uncertainty directly, we applied  
264 the rFRC mapping on two network output images ( $f_A(I_1)$  vs.  $f_B(I_1)$ ) from the same input ( $I_1$ ), in which  $f_A(I_1)$   
265 and  $f_B(I_1)$  are predicted from two models trained repeatedly ( $f_A$  and  $f_B$ ) (**Fig. 3h, 3i**). The network was nearly  
266 free from the model uncertainty when inputting the in-distribution data. The corresponding structures were  
267 predicted accurately (**Fig. 3d**), confirmed by the high-resolution distribution from the 'Model rFRC' mapping  
268 (**Fig. 3h**). When presenting the network with the out-of-distribution images, the predictions still approximated  
269 the corresponding structures from the expected '240 nm to 120 nm' transformation (**Fig. 3e**). As a result, the  
270 corresponding rFRC map represents an overall lower resolution distribution, indicating the model uncertainty  
271 increased by networks' ignorance of the out-of-distribution data (**Fig. 3i**). Interestingly, compared to the 'Data  
272 rFRC' (rFRC values, 0.75 vs. 3.93), we found the overall resolution decrease of 'Model rFRC' induced by the

273 out-of-distribution test is relatively small (rFRC values, 0.56 vs. 0.77), and it might reflect that most model  
274 uncertainty has been leaked to the data uncertainty.

275 *Combined uncertainty evaluated by rFRC (Combined rFRC).* To monitor the combination of both data  
276 and model uncertainties, we used the rFRC mapping on the two predictions ( $f_A(I_1)$  vs  $f_B(I_2)$ ), in which we  
277 employed two inputs ( $I_1$  and  $I_2$ ) for two models trained repeatedly ( $f_A$  and  $f_B$ ) (**Fig. 3j, 3k**). We found that the  
278 overall distributions of these rFRC maps are highly consistent with the results in 'Data rFRC'. The metrics of  
279 'Data rFRC' and 'Combined rFRC' from in-distribution predictions are almost identical (**Fig. 3l**), in which the  
280 mean rFRC values are 0.69 and 0.70, respectively. This suggests that the model uncertainty of in-distribution  
281 input is close to zero. In contrast, when examining the out-of-distribution predictions, the metrics of  
282 'Combined rFRC' are slightly larger than that of 'Data rFRC' (**Fig. 3m**), in which the mean rFRC values are  
283 3.68 and 3.91, respectively. The difference (3.68 versus 3.91) may indicate that there is still a tiny amount of  
284 residual model uncertainty after its leaking into the data uncertainty.

285  
286 **Assessments of learning-based restorations.** To illustrate the general applicability, we applied rFRC to  
287 several learning-based SR microscopes with experimental datasets, evaluating the local qualities of the  
288 network-extrapolated SR information (**Fig. 4**). For example, artificial neural network accelerated PALM  
289 (ANNA-PALM)<sup>45</sup> reconstructs dense images from sparse localization images, significantly reducing the total  
290 number of raw frames. In ANNA-PALM reconstruction, MLE reconstructions of individual molecules within  
291 25 frames were used as the input (**Methods, Fig. 4a-4e, Supplementary Fig. 10**), and the resultant SR image  
292 (**Fig. 4a**) resembled those generated by MLE of all molecules emitted within 500 frames (**Fig. 4b**). In this  
293 case, the experimental configurations of our tested input<sup>11</sup> are very different from the open-sourced model<sup>45</sup>,  
294 and thus this out-of-distribution input will induce a large model uncertainty. Although the repeatedly trained  
295 models are unavailable, the leaked model uncertainty can be detected by our rFRC map (using two captures)  
296 indirectly with the RSM contributing to perceiving the remnant part. We found rFRC map (**Fig. 4c**) can  
297 indicate all the subtle reconstruction uncertainties at filament intersections (cyan arrows, **Fig. 4e**), with the  
298 RSM finding the missing bulk structures (magenta arrows, **Fig. 4e**). All these local restoration qualities were  
299 assessed (**Fig. 4d**) without the 500-frame MLE image, and they were confirmed by comparing the ANNA-  
300 PALM image (**Fig. 4a**) with the ground truth (**Fig. 4b**).

301 The content-aware image restoration (CARE)<sup>40</sup> network framework enables more effective denoising and  
302 deconvolution. We directly reproduced the results using the open-sourced model and data<sup>40</sup> (**Methods**), and  
303 thus the corresponding predictions should be nearly free from the model uncertainty (**Fig. 4f-4i**). The rFRC

304 from two captures successfully detected the unreliable regions (cyan circle in **Fig. 4i**), in which the laterally  
305 displaced microtubules predicted at the boundary were due to edging effects but not real structures (cyan circle  
306 in **Fig. 4f**). Interestingly, by processing the predicted image back with a presumably space-invariant PSF and  
307 background (**Supplementary Fig. 11**), we identified excessive background fluorescence in a region (purple  
308 circle in **Fig. 4g**), absent in both the original image (**Fig. 4f**) and the TIRF reference (**Fig. 4h**), and our  
309 truncation operation on the RSM eliminated this potential false negative (the absence of red-color components  
310 in **Fig. 4i**).

311 Next, we explored the capability of our method in evaluating the noise-removal effects of the learning-  
312 based approaches. For example, Noise2Noise is a widely known unsupervised method that is superior in  
313 denoising noisy images without needing clean images<sup>46</sup>. Here we used fluorescence microscopy denoising  
314 (FMD)<sup>47</sup> datasets to train the Noise2Noise network (**Methods, Fig. 4j-4m, Supplementary Fig. 12**). Briefly,  
315 we fed the network with two images with independent noise but identical structure details, one for the input  
316 and the other for the output target. Because the corresponding wide-field reference of this task is unavailable,  
317 we used the rFRC map only. Interestingly, the suspicious area (in green) was amplified in the rFRC map (**Fig.**  
318 **4m**), and it was also verified by the least overlapped region between the model prediction and the average of  
319 50 noisy images (**Fig. 4j-4k**, white arrows). Finally, by applying a single-frame rFRC strategy, we also showed  
320 that it could reveal the hallucinations in learning-transformed SR-SIM images from wide-field images  
321 (**Methods, Supplementary Note 8.2**).

## 323 DISCUSSION

324 In deep learning applications, more and more microscopists have noticed the importance of model uncertainty.  
325 However, different from the *high-level* vision tasks, the learning-based microscopies intend to inverse the  
326 degraded images to their high-quality counterpart. This *low-level* forward (image degradation) and backward  
327 (learning to inverse the degradation) process will be more affected by the data qualities. We demonstrate that  
328 most model uncertainty has leaked into the data uncertainty in **Fig. 3** and **Supplementary Note 7.2**. This  
329 phenomenon suggests that the data uncertainty is even more crucial for learning-based microscopies.

330 According to the underlying theories of different modalities, the corresponding model uncertainties can  
331 be minimized by optical system calibrations<sup>10,29,30</sup>, or suppressed by a specifically designed learning strategy<sup>28</sup>  
332 and enough training data<sup>38</sup>. On the other hand, data uncertainty is fundamentally inevitable and difficult to  
333 remove, and there is still no effective method for its routine evaluation. In this work, we use rFRC with two

334 independent captures to measure the data uncertainty in general, and in particular for learning-based  
335 applications, we also provide a strategy to reveal both model and data uncertainties.

336 Without a reference, a map of uncertainty down to the SR scale will be crucial for extracting reliable and  
337 quantitative information from biological images. When the spatially different uncertainties revealed by rFRC,  
338 the way may be paved for these state-of-the-art imaging methods to be widely adopted in cell biological studies.  
339 Based on our analysis (**Fig. 2**), we uncover that the resolution heterogeneity can be a sought-after issue to be  
340 discussed in future methodological developments and even biological studies. Assisted by rFRC, we anticipate  
341 the developers and users can optimize the resolution heterogeneity and evaluate the performances for specific  
342 experiments. In addition, we also expect our rFRC can be broadly used as a cross-modality tool, evaluating  
343 the resolution heterogeneity for other typical localization microscopies, such as ultrasound localization  
344 microscopy<sup>48</sup> and the recently emerged localization atomic force microscopy<sup>49</sup>, offering well-founded  
345 systemic improvement schemes.

346 When two independent frames are unavailable, we also introduced two alternative single-frame strategies  
347 (**Supplementary Note 8**). For optical imaging modalities, we followed ref<sup>50</sup> and divided a single frame into  
348 four subsets to create two image pairs for the rFRC calculation (details in **Supplementary Note 8.1**). For  
349 learning-based methods, we added independent noise to raw data to create the required two-frame input  
350 (details in **Supplementary Note 8.2**). Finally, to avoid the potential false negative, it is suggested that the  
351 rFRC mapping skipped the background areas, requiring the background threshold determination. In addition  
352 to the global threshold background filter strategy, we adopted an adaptive method for local thresholds  
353 calculation to adapt to more modalities (**Methods, Supplementary Fig. 2c**). Regarding the modalities without  
354 the requirement of additional postprocessing, the rFRC map can also provide a fine resolution-map for imaging  
355 quality evaluation and further optimization (**Supplementary Note 5**). For 3D data, we applied rFRC mapping  
356 on volumetric datasets in a slice-by-slice manner to visualize the quality variations on each plane. The 3D  
357 extension of our method would require 3D rolling operation and the Fourier shell correlation (FSC)<sup>25</sup>  
358 calculation to further incorporate axial information.

359 In addition to the reference-free objective quality rating, we also expect our rFRC map can become a  
360 generalized metric in the presence of ground-truth, similar to the structural similarity (SSIM)<sup>51</sup>, to assess image  
361 quality closer to the human perception (**Supplementary Note 6**), which may be equally important in the SR  
362 microscopy field. By developing an open-source ImageJ plug-in, and libraries in different programming  
363 languages, we enable wide users to apply our method. We hope this metric will benefit image-based biological  
364 profiling and inspire further advances in the rapidly developing field of computational microscopes.

365

## 366 METHODS

367 **FRC calculation.** The FRC method measures the statistical correlation between two bidimensional signals  
368 over a series of concentric rings in the Fourier domain. It can be regarded as a function of the spatial frequency  
369  $q_i$ :

$$370 \quad FRC_{12}(q_i) = \frac{\sum_{r \in q_i} \mathcal{F}_1(r) \cdot \mathcal{F}_2^*(r)}{\sqrt{\sum_{r \in q_i} |\mathcal{F}_1(r)|^2 \cdot \sum_{r \in q_i} |\mathcal{F}_2(r)|^2}}, \quad (1)$$

371 where  $\mathcal{F}_1$  and  $\mathcal{F}_2$  denote the discrete Fourier transforms (DFTs) of the two signals and  $\sum_{r \in q_i}$  represents the  
372 summation over the pixels on the perimeter of circles of corresponding spatial frequency  $q_i$ .

373 Before calculation, a Hanning window is used to suppress the edge effects and other spurious correlations  
374 caused by the DFT calculation. The rectangular images should be zero-padded to produce squares to calculate  
375 the FRC curve. To calculate the discrete values of the corresponding spatial frequencies, it is necessary to  
376 define the discretization of the spatial frequencies of the FRC curve. The maximum frequency  $f_{\max}$  is half the  
377 inverse of the pixel size ( $p_s$ ), i.e.,  $f_{\max} = 1/(2 p_s)$ . Then the average filter with a half-width of the average  
378 window (equal to 3 frequency bins) is applied to smooth this noisy FRC curve.

379 When the FRC curve drops below a given threshold, the corresponding frequency is defined as the  
380 effective cutoff frequency (COF), whereas the resolution is the inverse of the effective COF. This threshold  
381 for FRC indicates the spatial frequency above which meaningful information beyond random noise can be  
382 extracted. Specifically, the common choices for the criterion/threshold are the fixed-value thresholds or the  
383 sigma-factor curves<sup>25</sup>. The fixed value is usually the 1/7 hard threshold, and the criterion of sigma-factor  
384 curves can be written as follows:

$$385 \quad \sigma_i = \frac{\sigma_{factor}}{\sqrt{N_i/2}}, \quad (2)$$

386 where  $N_i$  represents the number of pixels in a ring of radius  $q_i$  and the most commonly used  $\sigma_{factor}$  is 3. If the  
387 two measurements are corrupted with excessive noise, the FRC curve can be expressed as  $FRC_i = 1/\sqrt{N_i}$ <sup>25</sup>.

388 The 1/7 hard threshold has been widely used in determining the resolution of SR images. Although this  
389 fixed-value threshold method is incompatible with statistical assumptions<sup>25</sup>, the resolution obtained with that  
390 criterion is approximately accurate for SMLM<sup>14</sup> and the stimulated emission depletion microscopy (STED)  
391 microscopy<sup>52</sup>. The 1/7 threshold attains a similar result for a large image to the  $3\sigma$  curve criterion

(**Supplementary Fig. 15a**). However, this fixed threshold is overconfident for determining the resolutions of small image blocks, which is essential to map local SR errors in the reconstructions. In **Supplementary Fig. 15a**, the 1/7 threshold is smaller than all correlation values in the FRC curve and fails to yield the COF of small images (red cross). On the other hand, unlike avoiding the conservative threshold choice in resolution determination, we prefer a moderate threshold for quality mapping to reduce false positives. Therefore, we choose three standard deviations above the expected random noise fluctuations as the threshold<sup>25</sup>. This criterion is robust and accurate in examining small image blocks and calculating the FRC resolutions.

**rFRC map generation. Two-frame generation.** The rFRC mapping requires two independent frames of identical contents under the same imaging conditions. For the SMLM and the SRRF modalities (**Fig. 1-2, Fig. 4a-4i, Supplementary Fig. 5-10**), these two frames were generated by splitting the raw image sequence in half (odd and even frames) and reconstructing the resulting two image subsets independently. For the SIM, FPM, RL deconvolution, STED (**Supplementary Fig. 18-22**), and some learning-based methods (**Fig. 3, 4j-4m**), we directly imaged the identical contents twice to capture the required two frames. Regarding the two-frame unavailable configurations, we also provided two alternative strategies to produce two frames from the single accessible image in **Supplementary Note 8**.

**rFRC Mapping.** Since the FRC measures the global similarity between two images, we extend the FRC to a rolling form (rFRC) to provide the local distance measurements at the pixel level. We regard the FRC calculations as a filter in which the image is scanned block by block ( $64 \times 64$  pixels as a default size in this work), with each block assigned the corresponding FRC resolution. First, we pad the input image symmetrically around a half size of the block to calculate the FRC at the image boundaries (Step 1, **Fig. 1a**). Second, by setting the background threshold of the center pixel, we avoid FRC calculation of the background area. If the mean of the center pixels is larger than the threshold, we calculate the FRC and assign the FRC resolution to the center pixel of each block. In contrast, we set a zero value to the central pixel when it is smaller than the threshold (Steps 2-4, **Fig. 1a**). Afterward, we run this procedure block by block until the entire image is finished.

**Background thresholding.** By labeling designated structures specifically, fluorescence images confer high contrast and dark background areas containing background and readout noise. These regions, however, result in low FRC resolutions that are essentially false negatives. Therefore, we use two strategies to threshold the



background (**Supplementary Fig. 2**). We determine the hard threshold according to the images by user-defined global value adapting to their data (default method) or by an iterative wavelet transform method<sup>53</sup> to estimate local values automatically. For the global threshold, because different values lead to different regions being interrogated, we choose the hard threshold carefully based on two principles: 1) the removal of background; 2) the maintenance of structures. Regarding the local threshold, the background is iteratively estimated from the lowest-frequency wavelet bands of the images (**Supplementary Fig. 2c**). In each iteration, all image values above the current estimation are clipped.

*rFRC mapping acceleration.* Although the rFRC allows evaluation at the pixel level, the most delicate scale of detectable errors can only reach the highest resolution allowed by the system, which satisfies the Nyquist-Shannon sampling theorem. Thus, the smallest error should be larger than  $\sim 3 \times 3$  pixels. Therefore, we can skip 2~4 pixels for each rolling operation to accelerate the mapping calculation 4~16 times. The rFRC map can be resized to the original image size by bilinear interpolation for better visualization.

*Adaptively filtering the rFRC map.* The FRC calculation is not always stable and may generate aberrantly large values in neighboring pixels due to improperly determined COFs. Thus, we create an adaptive median filter to remove these inappropriate values. Instead of the standard median filter that replaces each pixel with the median of the neighboring pixels, we develop an adaptive median filter to remove only the isolated pixels with aberrantly large values, avoiding blurring of the rFRC map<sup>13</sup>. If the pixel intensity is larger than a preset fold (default as 2-fold) of the median in the window (default as 3-pixel), the pixel is replaced by the median value. Otherwise, the window moves to the next pixel.

*Drift correcting.* To correct relative movements between measurements, we use a method based on the phase correlation<sup>54</sup>. First, we calculate the cross-correlation function  $CC$  of the two images:

$$CC(x, y) = \mathcal{F}^{-1} \left\{ \mathcal{F}(M_1) \cdot \mathcal{F}(M_2)^* \right\}, \quad (3)$$

where  $M_1$  and  $M_2$  represent the two images. The peak of the  $CC$  is the shift between these two images that ensures the best-correlated  $M_1$  and  $M_2$ . After that, we find the centroid of the distribution of intensities of the cross-correlation function to achieve subpixel accuracy. This operation is executed before the rFRC mapping.

*rFRC colormap.* Choosing a proper color map to visualize error maps is another tricky question. The existing

453 popular color maps, such as Jet, use blue to red to index the different error magnitudes. However, people  
454 usually tend to define black (dark color) as small magnitude and white (light color) as large magnitude, which  
455 is identical to the logic of the gray color map. In this sense, the Jet color map may be incompatible with human  
456 intuition<sup>26</sup>. On the other hand, human vision is insensitive to light or dark gray levels and sensitive to different  
457 colors. As a result, we intend to create a color map using color to index the magnitudes and with black/white  
458 zone to visualize the smallest/largest values.

459 First, because human eyes are more sensitive to green color, we use green to highlight errors of large  
460 magnitude. Second, human instinct usually regards bright color (white) as an effect of large magnitude and  
461 dark color (black) for small magnitudes. Therefore, we involve a black zone (0, 0, 0) and a white zone (1, 1,  
462 1) in the color map to visualize the smallest and largest values. Taken together, we shift the Jet colormap (left  
463 panel of **Supplementary Fig. 3a**) to create the shifted Jet (sJet) color map (right panel of **Supplementary Fig.**  
464 **3a**). Along with the extension of the blue color component in this sJet color map, we obtain a white zone to  
465 represent the most significant error (even larger than those highlighted in green). Because the background in  
466 the rFRC map means no error, we use the black zone for the display. As shown in **Supplementary Fig. 3a**,  
467 our sJet color map is more intuitive for visualizing errors than the original Jet color map.

468 In addition to the sJet colormap, we also provided another alternative colormap, i.e., Jet with the black  
469 zone (bJet, middle panel of **Supplementary Fig. 3a**) while using red color to represent large magnitude. The  
470 readers are encouraged to try these colormaps and select their favorite ones.

471  
472 **rFRC value.** As mentioned above, the rFRC map can be used to subtly visualize the local uncertainties down  
473 to the SR scale. Here, we also intend to give two metrics for globally evaluating the entire image quality. One  
474 metric with dimension (*resolution*) represented the averaged resolution across the entire imaging field, namely  
475 rFRC resolution, and its calculation is given as follows:

$$476 \frac{\sum_{FV \neq 0} FV(x, y)}{\|FV(x, y)\|_0}, \quad (4)$$

477 where  $\|FV\|_0$  is the  $l_0$  norm, which represents the number of nonzero values in the rFRC map, and  $FV$  denotes  
478 the rFRC map.

479 Secondly, to reflect the potential deterioration rate of the reconstructed images, we provided a more  
480 generalized dimensionless metric, namely rFRC value. Here we normalize the rFRC resolution with its

481 corresponding minimum resolution, and subtract 1 to ensure its value starting at 0:

$$482 \quad \frac{\sum_{FV \neq 0} FV(x, y)}{\|FV(x, y)\|_0 \cdot \min(FV(x, y))} - 1. \quad (5)$$

483 It noted that both metrics can be further extended to three dimensions, in which the  $(x, y)$  two-dimensional  
484 coordinates can be raised to three dimensions  $(x, y, z)$  directly (3D rFRC value).

485

486 **RSM generation.** *Image intensity rescaling and resolution scaling function (RSF) estimation.* To normalize  
487 the intensity between low-resolution (LR) and high-resolution (HR) images and maximize the similarity  
488 between them, the intensity of the original HR image  $I_H$  needs to be linearly rescaled:

$$489 \quad I_{HS}(\mu, \theta) = I_H \times \mu + \theta, \quad (6)$$

490 where  $I_{HS}$  represents the HR image after linear rescaling. The values of  $\mu$  and  $\theta$  in **Eq. (6)** should be chosen to  
491 maximize the similarity between the LR image,  $I_L$ , and  $I_{HS}$  convolved with the RSF. Because the RSF is an  
492 unknown kernel used to transform an HR image into an LR image, it can be approximatively defined by a 2D  
493 Gaussian function with an unknown  $\sigma$ . The RSF is usually anisotropic in the  $x$  and  $y$  directions. Hence unlike  
494 its original version<sup>19</sup>, we set  $\sigma$  as a vector that includes two elements, i.e.,  $\sigma_x$  and  $\sigma_y$ .

495 Then, to estimate  $\mu$  and  $\theta$  for image intensity rescaling and  $\sigma_x$  and  $\sigma_y$  for RSF parameterization, we jointly  
496 optimize these four variables (**Supplementary Fig. 4**), i.e.,  $\mu$ ,  $\theta$ ,  $\sigma_x$ , and  $\sigma_y$ , to minimize the following function:

$$497 \quad \arg \min_{\mu, \theta, \sigma_x, \sigma_y} \|I_L - I_{HS}(\mu, \theta) \otimes I_{RSF}(\sigma_x, \sigma_y)\|_2^2. \quad (7)$$

498 Because the gradient in **Eq. (7)** is difficult to calculate, we use a derivative-free optimizer to search for the  
499 four optimal parameters. Different from the particle swarm optimization (PSO)<sup>55</sup> used previously<sup>19</sup>, we chose  
500 the pattern search method (PSM)<sup>56</sup> to optimize **Eq. (7)**. PSO searches for substantial candidate solutions and  
501 may not be necessary for a four-parameter optimization problem. Compared to the unstable and slow  
502 metaheuristic optimization approach of PSO, the PSM is stable, computationally effective, and direct. It is  
503 commonly used in small-scale parameter optimization problems and is more suitable for our RSM estimation.

504

505 *Metrics and pixel-wise error map of the RSM.* After obtaining  $\mu$  and  $\theta$  (image intensity rescaling factors) and  
506  $\sigma_x$  and  $\sigma_y$  (RSF parameters), we can transform the HR image  $I_H$  into its LR version  $I_{HL}$  by convolving the  
507 estimated RSF.

$$508 \quad I_{HL} = (I_L \times \mu + \theta) \otimes RSF = I_{HS}(\mu, \theta) \otimes I_{RSF}(\sigma). \quad (8)$$

To assess the global quality of the resolution-scaled-back image  $I_{HL}$  against the original LR image  $I_L$ , we use the common root mean squared error for the resolution-scaled error (RSE)<sup>19</sup> and the Pearson correlation coefficient for the resolution-scaled Pearson coefficient (RSP)<sup>19</sup>.

$$\begin{aligned} \text{RSE} &= \sqrt{\frac{\sum_{x,y} (I_L(x,y) - I_{HL}(x,y))^2}{n}} \\ \text{RSP} &= \frac{\sum_{x,y} (I_L(x,y) - \bar{I}_L)(I_{HL} - \bar{I}_{HL})}{\sqrt{\sum_{x,y} (I_L - \bar{I}_L)^2} \sqrt{\sum_{x,y} (I_{HL} - \bar{I}_{HL})^2}} \end{aligned} \quad (9)$$

In addition, to visualize the pixelwise absolute difference, the RSM between  $I_L$  and  $I_{HL}$  can be calculated by:

$$\text{RSM}(x,y) = |I_L(x,y) - I_{HL}(x,y)|. \quad (10)$$

**PANEL pinpointing.** To pinpoint regions with a high probability of error existence, we filter both the RSM and the rFRC to create a PANEL composite map. The small-magnitude components contained in the RSM may introduce false negatives. Therefore, we segment the RSM before integrating it into PANEL by the following equation:

$$\tilde{R}(x,y) = \begin{cases} R(x,y), & R(x,y) \in [0.5, 1] \\ 0, & R(x,y) \in [0, 0.5) \end{cases}, \quad (11)$$

where  $R(x,y)$  represents the normalized RSM value in the  $x, y$  positions and  $\tilde{R}$  denotes the segmented RSM. After this operation, the small false negative is filtered, leaving us with strong low-resolution scale error components, focusing on the true negatives detected by the RSM. On the other hand, the rFRC map indicates the degree of uncertainty. The smallest FRC value in the map may not represent the error existence. Likewise, we introduce a segmentation method called Otsu<sup>27</sup>, which automatically determines the threshold by maximizing the interclass variance, performing image thresholding to filter the background in the rFRC map, and highlighting the regions with a high possibility of error existence (**Supplementary Fig. 3b**).

After that, considering human eyes more sensitive to the green color, we used the rFRC as green channel for better visualization of fine details, and leave the red channel for RSM to display large-scale components. In detail, first, the rFRC map and the RSM are normalized to a 0~1 scale. Second, we filter the rFRC map and the RSM with the 'Otsu determined threshold' and the '0.5 threshold', respectively. Regions with values smaller than the thresholds are set to zero, and regions with larger values remain unchanged. Finally, we merge the rFRC map (green channel) and the RSM (red channel), and this operation is for qualitative pinpointing of

535 regions with low reliability. The original rFRC map and the 0.5 threshold filtered RSM can be separated if  
536 quantitative evaluations are required.

537 In addition, if the datasets are three-dimensional or under a non-Gaussian convolution relation (between  
538 the low-resolution and high-resolution scales), we cannot estimate the corresponding RSMs. For these datasets,  
539 the RSM is not integrated into PANEL.

540  
541 **SMLM Fusion.** The RSM estimates the errors at the low-resolution scale, which is not suitable for the SMLM  
542 fusion. In contrast, the rFRC estimates the degree of errors at the SR scale and thus is a superior choice to  
543 guide the fusion of SMLM. Using the rFRC quality metric, we can fuse different localization results according  
544 to the weights of the rFRC maps, resulting in combined reconstructions that perform better than any one of  
545 the reconstructions alone.

$$546 \frac{\sum_{n=1}^N L_n \cdot \{G(\sigma) \otimes (\max(F_{1-N}) - F_n)\}}{\sum_{n=1}^N G(\sigma) \otimes (\max(F_{1-N}) - F_n)}, \quad (12)$$

547 where  $L_n$  is the result of the  $n^{\text{th}}$  localization model, and  $G(\sigma)$  represents the Gaussian kernel with  $\sigma$  standard  
548 variance. The  $\max(F_{1-N})$  is the maximum FRC value of the total  $N$  localization results, and  $\otimes$  is the  
549 convolution operation. We use  $G$  ( $\sigma$  as 4 pixels) to slightly blur the rFRC map, avoiding oversharpen effects.

550  
551 **STORM imaging. Microscope setup.** After washing with phosphate buffer saline (PBS), the samples were  
552 mounted on glass slides with a standard STORM imaging buffer consisting of 5% w/v glucose,  $100 \times 10^{-3}$  M  
553 cysteamine,  $0.8 \text{ mg mL}^{-1}$  glucose oxidase, and  $40 \mu\text{g mL}^{-1}$  catalase in Tris-HCl (pH 7.5)<sup>33</sup>. Then, data were  
554 collected by 3D-STORM<sup>33</sup> carried out on a homebuilt setup based on a modified commercial inverted  
555 fluorescence microscope (Eclipse Ti-E, Nikon) using an oil-immersion objective (100×/1.45 NA, CFI Plan  
556 Apochromat  $\lambda$ , Nikon). Lasers at 405 nm and 647 nm were introduced into the cell sample through the  
557 objective's back focal plane and shifted toward the edge of the objective to illuminate  $\sim 1 \mu\text{m}$  within the glass-  
558 water interface. A strong ( $\sim 2 \text{ kW cm}^{-2}$ ) excitation laser of 647 nm photoswitched most of the labeled dye  
559 molecules into a dark state while also exciting fluorescence from the remaining sparsely distributed emitting  
560 dye molecules for single-molecule localization. A weak (typical range:  $0\text{--}1 \text{ W cm}^{-2}$ ) 405 nm laser was used  
561 concurrently with the 647 nm laser to reactivate fluorophores into the emitting state. Only a small, optically  
562 resolvable fraction of fluorophores was emitting at any given instant. A cylindrical lens was put into the

563 imaging path to introduce astigmatism to encode the depth (z) position into the ellipticity of the single-  
564 molecule images<sup>33</sup>. The EMCCD (iXon Ultra 897, Andor) camera recorded images at a 110-frame-rate for a  
565 frame size of  $256 \times 256$  pixels and typically recorded  $\approx 50000$  frames for each experiment. In addition, to form  
566 the 2D-STORM imaging, we removed the cylindrical lens in the optical layout.

567  
568 *STORM reconstruction.* The open-source software package Thunder-STORM<sup>31</sup> and customized 3D-STORM  
569 software<sup>33</sup> were used for STORM image reconstruction. Images labeled 'ME-MLE' and 'SE-MLE' were  
570 reconstructed by Thunder-STORM with maximum likelihood estimation (integrated PSF method), and multi-  
571 emitter fitting enabled ('ME-MLE') or not ('SE-MLE'). The images labeled 'SE-Gaussian' were reconstructed  
572 with the customized 3D-STORM software by fitting local maxima with an (elliptical) Gaussian function  
573 described previously in ref<sup>33</sup>. Drift correction was performed post-localization, and images were rendered  
574 using a normalized Gaussian function ( $\sigma$  as 2 pixels).

575  
576 *Cell culture, fixation, and immunofluorescence.* COS-7 cells were cultured in DMEM (GIBCO, 21063029)  
577 supplemented with 10% fetal bovine serum (FBS; GIBCO) in a humidified CO<sub>2</sub> incubator with 5% CO<sub>2</sub> at  
578 37 °C, following standard tissue-culture protocols. Then, cells were seeded on 12 mm glass coverslips in a 24-  
579 well plate at  $\sim 2 \times 10^4$  cells per well and cultured for 12 h. For STORM of actin filaments, a previously  
580 established fixation protocol<sup>57</sup> was employed: The samples were first fixed and extracted for 1 min with 0.3%  
581 v/v glutaraldehyde and 0.25% v/v Triton X-100 in cytoskeleton buffer (CB,  $10 \times 10^{-3}$  M MES, pH 6.1,  $150 \times$   
582  $10^{-3}$  M NaCl,  $5 \times 10^{-3}$  M EGTA,  $5 \times 10^{-3}$  M glucose, and  $5 \times 10^{-3}$  M MgCl<sub>2</sub>), postfixed for 15 min in 2% (v/v)  
583 glutaraldehyde in CB, and reduced with a freshly prepared 0.1% sodium borohydride solution in PBS. Alexa  
584 Fluor 647-conjugated phalloidin was applied at a concentration of  $\approx 0.4 \times 10^{-6}$  M for 1 h. The sample was  
585 briefly washed two to three times with PBS and then immediately mounted for imaging. For the imaging of  
586 other targets, samples were fixed with 3% w/v paraformaldehyde and 0.1% w/v glutaraldehyde in PBS for 20  
587 min. After reduction to a freshly prepared 0.1% sodium borohydride solution in PBS for 5 min, the samples  
588 were permeabilized and blocked in blocking buffer (3% w/v BSA, 0.5% v/v Triton X-100 in PBS) for 20 min.  
589 Afterward, the cells were incubated with the primary antibody (described above) in a blocking buffer for 1 h.  
590 After washing in a washing buffer (0.2% w/v BSA and 0.1% v/v Triton X-100 in PBS) three times, the cells  
591 were incubated with the secondary antibody for 1 h at room temperature. Then, the samples were washed three  
592 times with the washing buffer before being mounted for imaging.



594 **SIM imaging. TIRF-SIM.** Our SIM system was built upon a commercial inverted fluorescence microscope  
595 (IX83, Olympus) equipped with a TIRF objective (100×/1.7 NA, Apo N, HI Oil, Olympus) and a multiband  
596 dichroic mirror (DM, ZT405/488/561/640-phase R; Chroma) as described previously<sup>36</sup>. In short, laser light  
597 with wavelengths of 488 nm (Sapphire 488LP-200) and 561 nm (Sapphire 561LP-200, Coherent) and acoustic,  
598 optical tunable filters (AOTFs, AA Opto-Electronic, France) were used to combine, switch, and adjust the  
599 illumination power of the lasers. A collimating lens (focal length: 10 mm, Lightpath) was used to couple the  
600 lasers to a polarization-maintaining single-mode fiber (QPMJ-3AF3S, Oz Optics). The output lasers were then  
601 collimated by an objective lens (CFI Plan Apochromat Lambda 2× NA 0.10, Nikon) and diffracted by a pure  
602 phase grating that consisted of a polarizing beam splitter, a half-wave plate, and an SLM (3DM-SXGA,  
603 ForthDD). The diffraction beams were then focused by another achromatic lens (AC508-250, Thorlabs) onto  
604 the intermediate pupil plane, where a carefully designed stop mask was placed to block the zero-order beam  
605 and other stray light and to permit passage of  $\pm 1$  ordered beam pairs only. To maximally modulate the  
606 illumination pattern while eliminating the switching time between different excitation polarizations, a  
607 homemade polarization rotator was placed after the stop mask. Next, the light passed through another lens  
608 (AC254-125, Thorlabs) and a tube lens (ITL200, Thorlabs) to be focused onto the back focal plane of the  
609 objective lens, interfering with the image plane after passing through the objective lens. Emitted fluorescence  
610 collected by the same objective passed through a dichroic mirror, an emission filter, and another tube lens.  
611 Finally, the emitted fluorescence was split by an image splitter (W-VIEW GEMINI, Hamamatsu, Japan) before  
612 being captured by a sCMOS (Flash 4.0 V3, Hamamatsu, Japan) camera.

613  
614 **Hessian-SIM.** We applied the Hessian denoising algorithm<sup>36</sup> without the  $t$  continuity constraint on the Wiener-  
615 SIM reconstruction<sup>37</sup> results to obtain the Hessian-SIM images, as shown in **Supplementary Fig. 18**.

616  
617 **Cell maintenance and preparation.** Human umbilical vein endothelial cells (HUVECs) were isolated and  
618 cultured in an M199 medium (Thermo Fisher Scientific, 31100035) supplemented with fibroblast growth  
619 factor, heparin, and 20% FBS or in an endothelial cell medium (ECM) (ScienCell, 1001) containing  
620 endothelial cell growth supplement (ECGS) and 10% FBS. The cells were infected with a retrovirus system  
621 to express LifeAct-EGFP. The transfected cells were cultured for 24 h, detached using trypsin-EDTA, seeded  
622 onto poly-L-lysine-coated coverslips (H-LAF10L glass, reflection index: 1.788, thickness: 0.15 mm,  
623 customized), and cultured in an incubator at 37 °C with 5% CO<sub>2</sub> for an additional 20–28 h before the  
624 experiments. Liver sinusoidal endothelial cells (LSECs) were isolated and plated onto 100 µg/ml collagen-

625 coated coverslips and cultured in high-glucose DMEM supplemented with 10% FBS, 1% L-glutamine, 50  
626 U/ml penicillin, and 50 µg/ml streptomycin in an incubator at 37 °C with 5% CO<sub>2</sub> for 6 h before imaging.  
627 Live cells were incubated with DiI (100 µg/ml, Biotium, 60010) for 15 min at 37 °C, whereas fixed cells were  
628 fixed with 4% formaldehyde at room temperature for 15 min before labeling with DiI. For the SIM imaging  
629 experiments, cells were seeded onto coverslips (H-LAF 10L glass, reflection index: 1.788, diameter: 26 mm,  
630 thickness: 0.15 mm, customized).

631  
632 **STED imaging. *Microscope setup.*** Image acquisition of stimulated emission depletion (STED) microscopy<sup>58</sup>  
633 was achieved using a gated STED (gSTED) microscope (Leica TCS SP8 STED 3X, Leica Microsystems,  
634 Germany) equipped with a wide-field objective (100×/1.40 NA, HCX PL APO, Oil, Leica). The excitation  
635 and depletion wavelengths were 647 nm and 775 nm, respectively. All images were obtained using the LAS  
636 AF software (Leica).

637  
638 ***Cell maintenance and preparation.*** COS-7 cells were cultured in high-glucose DMEM (GIBCO, 21063029)  
639 supplemented with 10% fetal bovine serum (FBS, GIBCO) and 1% 100 mM sodium pyruvate solution (Sigma-  
640 Aldrich, S8636) in an incubator at 37°C with 5% CO<sub>2</sub> until ~75% confluency was reached. To label the  
641 microtubules in live cells shown in **Supplementary Fig. 22**, COS-7 cells were incubated with SiR-Tubulin  
642 (Cytoskeleton, CY-SC002) for ~20 mins before imaging without washing.

643  
644 **Open-source datasets.** In addition to the custom-collected datasets, we also used freely available  
645 simulation/experiment datasets to illustrate the broad applicability of our method.

646  
647 ***2D-SMLM simulation datasets.*** The '*Bundled Tubes High Density*' (361 frames) and '*Bundled Tubes Long*  
648 *Sequence*' (12000 frames) datasets from the '*Localization Microscopy Challenge datasets*'<sup>11</sup> on the EPFL  
649 website were used as the high-density and low-density 2D-SMLM simulation datasets in this work, as shown  
650 in **Fig. 1c**. The NA of the optical system was 1.4 (oil-immersion objective), and the wavelength of the  
651 fluorescence was 723 nm.

652  
653 ***3D-SMLM.*** The '*MT1.NI.LD*' (19996 frames, 3D-Astigmatism PSF) dataset from the '*Localization*  
654 *Microscopy Challenge datasets*'<sup>132</sup> on the EPFL website was used as the low-density 3D-SMLM simulation

dataset in this work, as shown in **Supplementary Fig. 6**. The NA of the optical system was 1.49 (oil-immersion objective), and the wavelength of the fluorescence was 660 nm. All the images had a frame size of  $64 \times 64$  pixels (pixel size as 100 nm). Then, 20 frames from this low-density dataset were averaged into one frame to generate the corresponding high-density 3D-SMLM dataset (resulting in 998 frames).

**2D-SMLM experimental datasets.** The 'Localization Microscopy Challenge datasets'<sup>11</sup> also contain experimental data, and 500 high-density images of tubulins were acquired from the EPFL website (**Supplementary Fig. 7a, 7b**). The NA of the optical system was 1.3 (oil-immersion objective), and the wavelength of the fluorescence was 690 nm. The images were recorded with a camera at a 25-frame-rate for a frame size of  $64 \times 64$  pixels (pixel size as 100 nm).

**Live-cell SRRF datasets.** The GFP-tagged microtubules in live HeLa cells were imaged by the TIRF mode with a TIRF objective (100 $\times$ /1.46 NA, Plan Aplanachromat, Oil, Zeiss) and an additional 1.6 $\times$  magnification with 488 nm laser illumination<sup>20</sup> (200 frames in total). The open-source ImageJ plugin<sup>20</sup> was used to reconstruct the SRRF results (**Supplementary Fig. 7c**).

**Simulations of the grid imaged by SMLM.** Following ref<sup>19</sup>, we created a regular grid on a pixel of 10 nm in size (**Supplementary Fig. 5c**). The density of the randomly activated molecule was set as increasing gradually from the center to the sides. Then, the resulting image sequence was convoluted with a Gaussian kernel with an FWHM of 280 nm and down-sampled ten times (pixel size 100 nm). After that, Poisson and 20% Gaussian noise were injected into the image sequence (**Supplementary Fig. 5d**). Finally, the image sequence was reconstructed by Thunder-STORM with maximum likelihood estimation (integrated PSF method), which enabled the multi-emitter fitting function.

**Simulation of Fourier ptychographic microscopy (FPM).** We used the United States Air Force (USAF) resolution target as the ground-truth sample of the FPM<sup>59</sup> (**Supplementary Fig. 21a**). The intensity and phase of the imaged sample were both set as those of the USAF target with a size of  $240 \times 240$  pixels (pixel size: 406.3 nm). Illumination from different angles was provided by a  $7 \times 7$  LED matrix, whose emission wavelength was 532 nm and distance to the sample was 90 mm. The sample was illuminated by each LED unit, filtered by the objective (4 $\times$ /0.1 NA), and sampled by the camera (image size as  $60 \times 60$  and pixel size as 1.625  $\mu$ m). After the LEDs illuminated the sample, the final 49 low-resolution images were obtained. We

686 used the image illuminated by the LED in the center as the initial image. Then, the amplitude and phase of the  
687 corresponding aperture were updated in turn in each FPM iteration. After 10 iterations, the final high-  
688 resolution complex-amplitude image ( $240 \times 240$ ) was obtained, the size of which was enlarged by  $4\times$   
689 compared to the corresponding low-resolution images.

690  
691 **Data generation processes of learning-based applications.** *The 240 nm PSF to 120 nm PSF image*  
692 *transformation.* The deep neural network (DNN) was trained with 240 nm PSF convoluted images and  
693 corresponding 120 nm PSF convoluted images as the ground truth. We created synthetic tubulin structures  
694 using the random walk process to simulate two-dimensional trajectories with randomly changing orientations,  
695 and the maximal curvature was set as a limited value, respecting the known physical stiffness properties of  
696 tubulin<sup>40</sup>. The structures were then convoluted with a 240 nm PSF or a 120 nm PSF, and down-sampled 2  
697 times (40 nm pixel size) as the input or ground-truth. To simulate the realistic fluorescent background, we  
698 convoluted the blurred images with a larger Gaussian kernel (FWHM as  $\sim 2.5 \mu\text{m}$ ), and added it to the blurred  
699 images. Then, the Poisson noise and 10% Gaussian noise were involved in the images to produce the final  
700 input images for DNN training. Following the same procedure, additional 24 images were generated as test  
701 dataset.

702  
703 *Sparse sampling.* The DNN was trained with sparsely sampled geometrical structures and corresponding intact  
704 structures as the ground truth. We chose four simple and common geometrical structures, i.e., triangles, circles,  
705 rectangles, and squares, for the simulations<sup>60</sup>. The spatial size and the number of structures in one input image  
706 are shown in **Supplementary Table 1**. After obtaining the structures, we randomly sampled the image at a  
707 sampling rate of 8%. We selected rectangular structures and used 5000 images as the training dataset. For each  
708 geometrical structure, we generated 200 images as a test dataset.

709  
710 *Noise2Noise.* Noise2Noise<sup>46</sup> is an unsupervised learning procedure to denoise noisy images without clean  
711 ones. The DNN only looks at noisy image pairs (two images with independent noise that share the exact details)  
712 during training, i.e., one as input and the other as the output target. The fluorescence microscopy denoising  
713 (FMD) dataset<sup>47</sup> was used in this Noise2Noise task. We chose fixed zebrafish embryos [EGFP-labeled *Tg*  
714 (*sox10:megfp*) zebrafish at 2 days postfertilization] as the dataset, imaged by a commercial Nikon A1R-MP  
715 laser scanning confocal microscope at very low excitation power. This imaging configuration has 5 noise  
716 levels. The raw images had the highest noise level, and images at other noise levels were generated by

717 averaging multiple frames (2, 4, 8, and 16) of raw images using the circular averaging method. To test extreme  
718 conditions, we chose only the raw images with the highest noise level as the input of the training set (every  
719 two raw images). For each FOV (total of 20) with 50 different noise realizations, we randomly chose 200  
720 noise-noise data pairs. Moreover, we cropped the raw images of size  $512 \times 512$  to four nonoverlapping patches  
721 of size  $256 \times 256$ . Finally, we obtained  $20 \times 200 \times 4 = 16000$  images as the training dataset. By averaging 50  
722 noisy raw images, we generated the ground-truth reference to evaluate the accuracy of the Noise2Noise  
723 prediction.

724  
725 **Network architecture and training procedure.** *Network architecture.* The network architecture, called the  
726 U-shaped architecture (U-net), is composed of a contracting path and an expansive path<sup>61</sup>. In the contracting  
727 path, the input layer is followed by a successive down-convolution block, consisting of  $4 \times 4$  kernel  
728 convolution with a stride step of 2, batch normalization (BN)<sup>62</sup>, and a leaky rectified linear unit (LeakyReLU)  
729 function. A convolutional layer lies at the bottom of this U-shaped structure that connects the down-  
730 convolution and up-convolution blocks. The expansive pathway combines the feature and spatial information  
731 from the contracting path through a series of up-convolution blocks (Upsampling2D operation +  $4 \times 4$  kernel  
732 convolution with stride step of 1 + BN + ReLU) and concatenations with high-resolution features. The last  
733 layer is another convolutional layer that maps the 32 channels into one channel image. We used two U-shaped  
734 network architectures (U-net<sup>1</sup> and U-net<sup>2</sup>) in different tasks (**Supplementary Fig. 13**). U-net<sup>1</sup> has 7 down-  
735 convolution blocks and 7 up-convolution blocks, whereas U-net<sup>2</sup> has 4 down-convolution blocks and 4 up-  
736 convolution blocks.

737  
738 *Training procedure.* All the networks were trained using stochastic gradient descent with adaptive moment  
739 estimation (Adam)<sup>63</sup>. The detailed input patch size of the training images, number of epochs, batch size,  
740 number of training images, learning rate, network architecture, number of parameters, and loss function for  
741 each task were shown in **Supplementary Fig. 14** and **Supplementary Table 2**. All the training procedures  
742 were performed on a local workstation equipped with an NVIDIA Titan Xp GPU card. The related learning  
743 framework was implemented with the TensorFlow<sup>64</sup> framework (version 1.8.0) and Python (version 3.6).

744  
745 **Using open-source deep-learning models.** *ANNA-PALM.* ANNA-PALM<sup>45</sup> computationally reconstructs SR  
746 images from sparse, rapidly captured localization data. ANNA-PALM was trained using densely sampled  
747 PALM images (long sequence) as the ground truth and the corresponding sparsely sampled PALM images

(short sequence) as the input. ANNA-PALM is based on a conditional GAN<sup>65</sup> (cGAN<sup>1</sup> in **Supplementary Fig. 14**) with U-net<sup>1</sup> as the generator. We tested the performance of ANNA-PALM using the 500 high-density images of tubulins from the EPFL website<sup>11</sup>. The fluorophores in frames 1-25 and 26-50 were localized using the ME-MLE estimator to construct two sparse SR inputs, and then the trained ANNA-PALM model predicted the corresponding dense sampled images.

**CARE.** The CARE framework has been described in detail elsewhere<sup>40</sup>; it is a computational approach that can extend the spatial resolution of microscopes using the U-net<sup>3</sup> architecture. We fed the open-source trained model of CARE with the two averaged images (100 frames for each) from the *open-source SRRF dataset*, generating the corresponding two super-resolved images.

**Cross-modality super-resolution.** The cross-modality imaging ability of the DNN was demonstrated previously<sup>66</sup> by mapping the TIRF to the TIRF-SIM modality (TIRF2SIM) using the cGAN approach. The cGAN<sup>2</sup> (**Supplementary Fig. 14**) in TIRF2SIM is based on U-net<sup>2</sup> with the residual convolutional blocks (Res-Unet) as the generator. It was trained and tested using AP2-eGFP-tagged clathrin in gene-edited SUM159 cells. We used the provided ImageJ plugin and example data to reproduce the results directly (**Supplementary Fig. 27b**).

**DFGAN-SIM.** The deep Fourier channel attention network trained with the GAN strategy (DFGAN-SIM)<sup>67</sup> was developed to reconstruct SIM images by inputting 9 raw frames. In **Supplementary Fig. 27g**, we employed the provided frozen network weights ('DFGAN-SIM\_MTs' trained on microtubule images, with enconsin-mEmerald in the COS-7 cells) and their example SIM data (microtubule images in the BioSR dataset, with enconsin-mEmerald in the COS-7 cells) to reproduce the results directly. We used the images captured by our SIM system (mitochondrial cristae images, with MitoTracker Green in the COS-7 cells) to test the same model ('DFGAN-SIM\_MTs'), as shown in **Supplementary Fig. 27i**.

**Image rendering and processing.** We used the custom-developed color maps, shifted Jet and black Jet (sJet and bJet), to visualize the rFRC maps in this work. The color maps 'SQUIRREL-FRC'<sup>19</sup> were used to present the FRC maps in the **Supplementary Fig. 15d**, and **17**. The color maps 'SQUIRREL-Errors'<sup>19</sup> were used to present the difference map in the second and third columns of **Fig. 1b**, **1c**, the bottom panel of **Fig. 2h**, the fourth column of **Fig. 4e**, the bottom panel of **Fig. 4g**, and the third panel of **Supplementary Fig. 7b**. The



volumes in **Supplementary Fig. 9a-9c** were rendered by ClearVolume<sup>68</sup>. The Jet color map projection was used to show the intensity in **Supplementary Fig. 2c**, and the depth in **Supplementary Fig. 9g**. All data processing was achieved using MATLAB and ImageJ. All figures were prepared with MATLAB, ImageJ, Microsoft Visio, and OriginPro.

**Data availability.** All the data that support the findings of this study are available from the corresponding author on request.

**Code availability.** The updated version of this work in MATLAB library can be found at <https://github.com/WeisongZhao/PANELM>, and the corresponding Python library can be found at <https://github.com/WeisongZhao/PANELpy>. The updated ImageJ plugin and its source code can be found at <https://github.com/WeisongZhao/PANELJ>. The online tutorials can be found on the corresponding GitHub wikis.

**Acknowledgments.** We thank National Center for Protein Sciences at Peking University in Beijing, China, for assistance with STED imaging experiments. H. L. acknowledges support by grants from the National Natural Science Foundation of China (61805057); the Young Elite Scientists Sponsorship Program (2018QNRC001); and the Natural Science Foundation of Heilongjiang Province (YQ2021F013). L. C. acknowledges support from grants from the National Natural Science Foundation of China (92054301, 81925022, 31821091, 91750203), the National Science and Technology Major Project Program (2016YFA0500400); and the Beijing Natural Science Foundation (Z20J00059). P. L. acknowledges support from grants from the National Natural Science Foundation of China (11874231); and Guangdong Major Project of Basic and Applied Basic Research (2020B0301030009). H. L. and W. Z. acknowledge support from the State Key Laboratory of Robotics and Systems. L. C. acknowledges support from the High-performance Computing Platform of Peking University. S. Z. acknowledges support from the Boya Postdoctoral Fellowship of Peking University. H. M. acknowledges support from grants from the National Natural Science Foundation of China (32071458).

**Author contributions.** H. L., L. C., L. P., and W. Z. supervised the project; W. Z., H. L., and L. C. initiated and conceived the research; W. Z. developed the method; W. Z. implemented the corresponding software with the contribution of L. Q. and G. Q.; W. Z. designed the theoretical model and experiments, analyzed the data,

and prepared the figures; X. H. and J. Y. performed the experiments and collected the data with the contribution of S. Z.; W. Z. performed the simulations and tests of the learning-based applications with the contributions of G. Q., L. Q., Y. Z., and X. W.; Z. L. reproduced and tested the DFGAN-SIM under the supervision of H. M.; Y. J., H. M., X. D., J. T., Y. H., and L. P. participated in discussions during the development of the manuscript; W. Z., H. L., and L. C. wrote and revised the manuscript with input from all authors; All authors participated in the discussions and data interpretation.

**Competing interests.** L. C., H. L., and W. Z. have a pending patent application on the presented framework.

## REFERENCES

1. Schermelleh, L. et al. Super-resolution microscopy demystified. *Nature cell biology* **21**, 72-84 (2019).
2. Zeng, Z. et al. Computational methods in super-resolution microscopy. *Engineering* **18**, 1222-1235 (2017).
3. Dempsey, G., Vaughan, J., Chen, K.H., Bates, M. & Zhuang, X. Evaluation of fluorophores for optimal performance in localization-based super-resolution imaging. *Nature Methods* **8**, 1027-1036 (2011).
4. Diekmann, R. et al. Optimizing imaging speed and excitation intensity for single-molecule localization microscopy. *Nature Methods*, 1-4 (2020).
5. Helmerich, D.A., Beliu, G., Matikonda, S.S., Schnermann, M.J. & Sauer, M. Photobleaching of organic dyes can cause artifacts in super-resolution microscopy. *Nature Methods* **18**, 253-257 (2021).
6. Linde, S. et al. Direct stochastic optical reconstruction microscopy with standard fluorescent probes. *Nature Protocols* **6**, 991-1009 (2011).
7. Almada, P., Culley, S. & Henriques, R. PALM and STORM: Into large fields and high-throughput microscopy with sCMOS detectors. *Methods* **88**, 109-121 (2015).
8. Erdélyi, M. et al. Origin and compensation of imaging artefacts in localization-based super-resolution microscopy. *Methods* **88**, 122-132 (2015).
9. Schaefer, L.H., Schuster, D. & Schaffer, J. Structured illumination microscopy: artefact analysis and reduction utilizing a parameter optimization approach. *Journal of Microscopy* **216**, 165 - 174 (2004).
10. Demmerle, J. et al. Strategic and practical guidelines for successful structured illumination microscopy. *Nature Protocols* **12**, 988-1010 (2017).
11. Sage, D. et al. Quantitative evaluation of software packages for single-molecule localization microscopy. *Nature Methods* **12**, 717-724 (2015).
12. Mo, Y., Feng, F., Mao, H., Fan, J. & Chen, L. Structured illumination microscopy artefacts caused by illumination scattering. *Philosophical Transactions of the Royal Society A* **379**, 20200153 (2021).
13. Weisong, Z. et al. Sparse deconvolution improves the resolution of live-cell super-resolution fluorescence microscopy. *Nature biotechnology* **40**, 606–617 (2022).
14. Nieuwenhuizen, R.P. et al. Measuring image resolution in optical nanoscopy. *Nature Methods* **10**, 557-562 (2013).
15. Baxter, W.T., Grassucci, R.A., Gao, H. & Frank, J. Determination of signal-to-noise ratios and spectral SNRs in cryo-EM low-dose imaging of molecules. *Journal of Structural Biology* **166**, 126-132 (2009).
16. Betzig, E. et al. Imaging Intracellular Fluorescent Proteins at Nanometer Resolution. *Science* **313**, 1642-1645 (2006).
17. Rust, M., Bates, M. & Zhuang, X. Sub-diffraction-limit imaging by stochastic optical reconstruction microscopy (STORM). *Nature Methods* **3**, 793-796 (2006).
18. Balzarotti, F. et al. Nanometer resolution imaging and tracking of fluorescent molecules with minimal photon fluxes.

- 851 *Science* **355**, 606-612 (2017).
- 852 19. Culley, S. et al. Quantitative mapping and minimization of super-resolution optical imaging artifacts. *Nature Methods*  
853 **15**, 263-266 (2018).
- 854 20. Gustafsson, N. et al. Fast live-cell conventional fluorophore nanoscopy with ImageJ through super-resolution radial  
855 fluctuations. *Nature Communications* **7**, 1-9 (2016).
- 856 21. (!!! INVALID CITATION !!! 21).
- 857 22. Richardson, W.H. Bayesian-based iterative method of image restoration. *Journal of The Optical Society of America*  
858 *A* **62**, 55-59 (1972).
- 859 23. Lucy, L.B. An iterative technique for the rectification of observed distributions. *The Astronomical Journal* **79**, 745  
860 (1974).
- 861 24. Schindelin, J.E. et al. Fiji: an open-source platform for biological-image analysis. *Nature Methods* **9**, 676-682 (2012).
- 862 25. Heel, M.v. & Schatz, M. Fourier shell correlation threshold criteria. *Journal of Structural Biology* **151**, 250-262  
863 (2005).
- 864 26. Cramer, F., Shephard, G. & Heron, P.J. The misuse of colour in science communication. *Nature Communications* **11**,  
865 1-10 (2020).
- 866 27. Otsu, N. A threshold selection method from gray-level histograms. *IEEE Transactions on Systems* **9**, 62-66 (1979).
- 867 28. Beker, W., WpBos, A., Szymk, S. & Grzybowski, B. Minimal-uncertainty prediction of general drug-likeness based  
868 on Bayesian neural networks. *Nature Machine Intelligence* **2**, 457-465 (2020).
- 869 29. You, S.y., Chao, J., Cohen, E.A., Ward, E. & Ober, R.J. Microscope calibration protocol for single-molecule  
870 microscopy. *Optics Express* **29**, 182-207 (2021).
- 871 30. Faklaris, O. et al. Quality assessment in light microscopy for routine use through simple tools and robust metrics.  
872 *Journal of Cell Biology* **221**, e202107093 (2022).
- 873 31. Ovesný, M., Krížek, P., Borkovec, J., Svindrych, Z. & Hagen, G.M. ThunderSTORM: a comprehensive ImageJ plug-  
874 in for PALM and STORM data analysis and super-resolution imaging. *Bioinformatics* **30**, 2389-2390 (2014).
- 875 32. Sage, D. et al. Super-resolution fight club: Assessment of 2D & 3D single-molecule localization microscopy software.  
876 *Nature Methods* **16**, 387 - 395 (2019).
- 877 33. Huang, B., Wang, W., Bates, M. & Zhuang, X. Three-Dimensional Super-Resolution Imaging by Stochastic Optical  
878 Reconstruction Microscopy. *Science* **319**, 810-813 (2008).
- 879 34. Obara, C.J., Moore, A.S. & Lippincott-Schwartz, J. Structural diversity within the endoplasmic reticulum—from the  
880 microscale to the nanoscale. *Cold Spring Harbor Perspectives in Biology*, a041259 (2022).
- 881 35. Min, J. et al. FALCON: fast and unbiased reconstruction of high-density super-resolution microscopy data. *Scientific*  
882 *Reports* **4**, 1-9 (2014).
- 883 36. Huang, X. et al. Fast, long-term, super-resolution imaging with Hessian structured illumination microscopy. *Nature*  
884 *biotechnology* **36**, 451-459 (2018).
- 885 37. Gustafsson, M.G. et al. Three-dimensional resolution doubling in wide-field fluorescence microscopy by structured  
886 illumination. *Biophysical Journal* **94**, 4957-4970 (2008).
- 887 38. Kendall, A. & Gal, Y. What Uncertainties Do We Need in Bayesian Deep Learning for Computer Vision? *Advances*  
888 *in Neural Information Processing Systems*, 5580-5590 (2017).
- 889 39. Lakshminarayanan, B., Pritzel, A. & Blundell, C. Simple and scalable predictive uncertainty estimation using deep  
890 ensembles. *Advances in Neural Information Processing Systems* **30**, 6402–6413 (2017).
- 891 40. Weigert, M. et al. Content-aware image restoration: pushing the limits of fluorescence microscopy. *Nature Methods*  
892 **15**, 1090-1097 (2018).
- 893 41. Xue, Y., Cheng, S., Li, Y. & Tian, L. Reliable deep-learning-based phase imaging with uncertainty quantification.  
894 *Optica* **6**, 618-629 (2019).
- 895 42. Speiser, A. et al. Deep learning enables fast and dense single-molecule localization with high accuracy. *Nature*  
896 *Methods* **18**, 1082-1090 (2021).

- 897 43. Qiao, C. et al. Rationalized deep learning super-resolution microscopy for sustained live imaging of rapid subcellular  
898 processes. *Nature biotechnology* (2022).
- 899 44. Chen, J. et al. Three-dimensional residual channel attention networks denoise and sharpen fluorescence microscopy  
900 image volumes. *Nature Methods* **18**, 678-687 (2021).
- 901 45. Ouyang, W., Aristov, A., Lelek, M., Hao, X. & Zimmer, C. Deep learning massively accelerates super-resolution  
902 localization microscopy. *Nature biotechnology* **36**, 460-468 (2018).
- 903 46. Lehtinen, J. et al. Noise2Noise: Learning Image Restoration without Clean Data. *Preprint at*  
904 <https://arxiv.org/abs/1803.04189> (2018).
- 905 47. Zhang, Y. et al. A poisson-gaussian denoising dataset with real fluorescence microscopy images. *IEEE Conference*  
906 *on Computer Vision and Pattern Recognition*, 11710-11718 (2019).
- 907 48. Errico, C. et al. Ultrafast ultrasound localization microscopy for deep super-resolution vascular imaging. *Nature* **527**,  
908 499-502 (2015).
- 909 49. Heath, G.R. et al. Localization atomic force microscopy. *Nature* **594**, 385-390 (2021).
- 910 50. Koho, S. et al. Fourier ring correlation simplifies image restoration in fluorescence microscopy. *Nature*  
911 *Communications* **10**, 1-9 (2019).
- 912 51. Wang, Z., Bovik, A.C., Sheikh, H.R. & Simoncelli, E.P. Image quality assessment: from error visibility to structural  
913 similarity. *IEEE Transactions on Image Processing* **13**, 600-612 (2004).
- 914 52. Tortarolo, G., Castello, M., Diaspro, A., Koho, S. & Vicidomini, G. Evaluating image resolution in stimulated  
915 emission depletion microscopy. *Optica* **5**, 32-35 (2018).
- 916 53. Galloway, C., Le Ru, E. & Etchegoin, P. An iterative algorithm for background removal in spectroscopy by wavelet  
917 transforms. *Applied Spectroscopy* **63**, 1370-1376 (2009).
- 918 54. Guizar-Sicairos, M., Thurman, S. & Fienup, J. Efficient subpixel image registration algorithms. *Optics Letters* **33**,  
919 156-158 (2008).
- 920 55. Poli, R., Kennedy, J. & Blackwell, T. Particle swarm optimization. *Swarm Intelligence* **1**, 33-57 (2007).
- 921 56. Lewis, R.M., Torczon, V. & Trosset, M.W. Direct search methods: then and now. *Journal of computational Applied*  
922 *Mathematics* **124**, 191-207 (2000).
- 923 57. Xu, K., Babcock, H.P. & Zhuang, X. Dual-objective STORM reveals three-dimensional filament organization in the  
924 actin cytoskeleton. *Nature Methods* **9**, 185-188 (2012).
- 925 58. Vicidomini, G. et al. Sharper low-power STED nanoscopy by time gating. *Nature Methods* **8**, 571-573 (2011).
- 926 59. Zheng, G., Horstmeyer, R. & Yang, C. Wide-field, high-resolution Fourier ptychographic microscopy. *Nature*  
927 *Photonics* **7**, 739-745 (2013).
- 928 60. Moeckl, L., Roy, A.R. & Moerner, W. Deep learning in single-molecule microscopy: fundamentals, caveats, and  
929 recent developments. *Biomedical Optics Express* **11**, 1633-1661 (2020).
- 930 61. Ronneberger, O., Fischer, P. & Brox, T. U-net: Convolutional networks for biomedical image segmentation.  
931 *International Conference on Medical Image Computing and Computer-Assisted Intervention*, 234-241 (2015).
- 932 62. Ioffe, S. & Szegedy, C. Batch normalization: Accelerating deep network training by reducing internal covariate shift.  
933 *International Conference on Machine Learning*, 448-456 (2015).
- 934 63. Kingma, D.P. & Ba, J. Adam: A method for stochastic optimization. *Preprint at* <https://arxiv.org/abs/1412.6980>  
935 (2014).
- 936 64. Abadi, M. et al. Tensorflow: A system for large-scale machine learning. *12th USENIX Symposium On Operating*  
937 *Systems Design And Implementation (OSDI)*, 265-283 (2016).
- 938 65. Mirza, M. & Osindero, S. Conditional Generative Adversarial Nets. *Preprint at* <https://arxiv.org/abs/1411.1784>  
939 (2014).
- 940 66. Wang, H. et al. Deep learning enables cross-modality super-resolution in fluorescence microscopy. *Nature Methods*  
941 **16**, 103-110 (2018).
- 942 67. Qiao, C. et al. Evaluation and development of deep neural networks for image super-resolution in optical microscopy.

943 *Nature Methods* **18**, 194-202 (2021).

944 68. Royer, L.A. et al. ClearVolume: open-source live 3D visualization for light-sheet microscopy. *Nature Methods* **12**,  
945 480-481 (2015).



946

## FIGURES

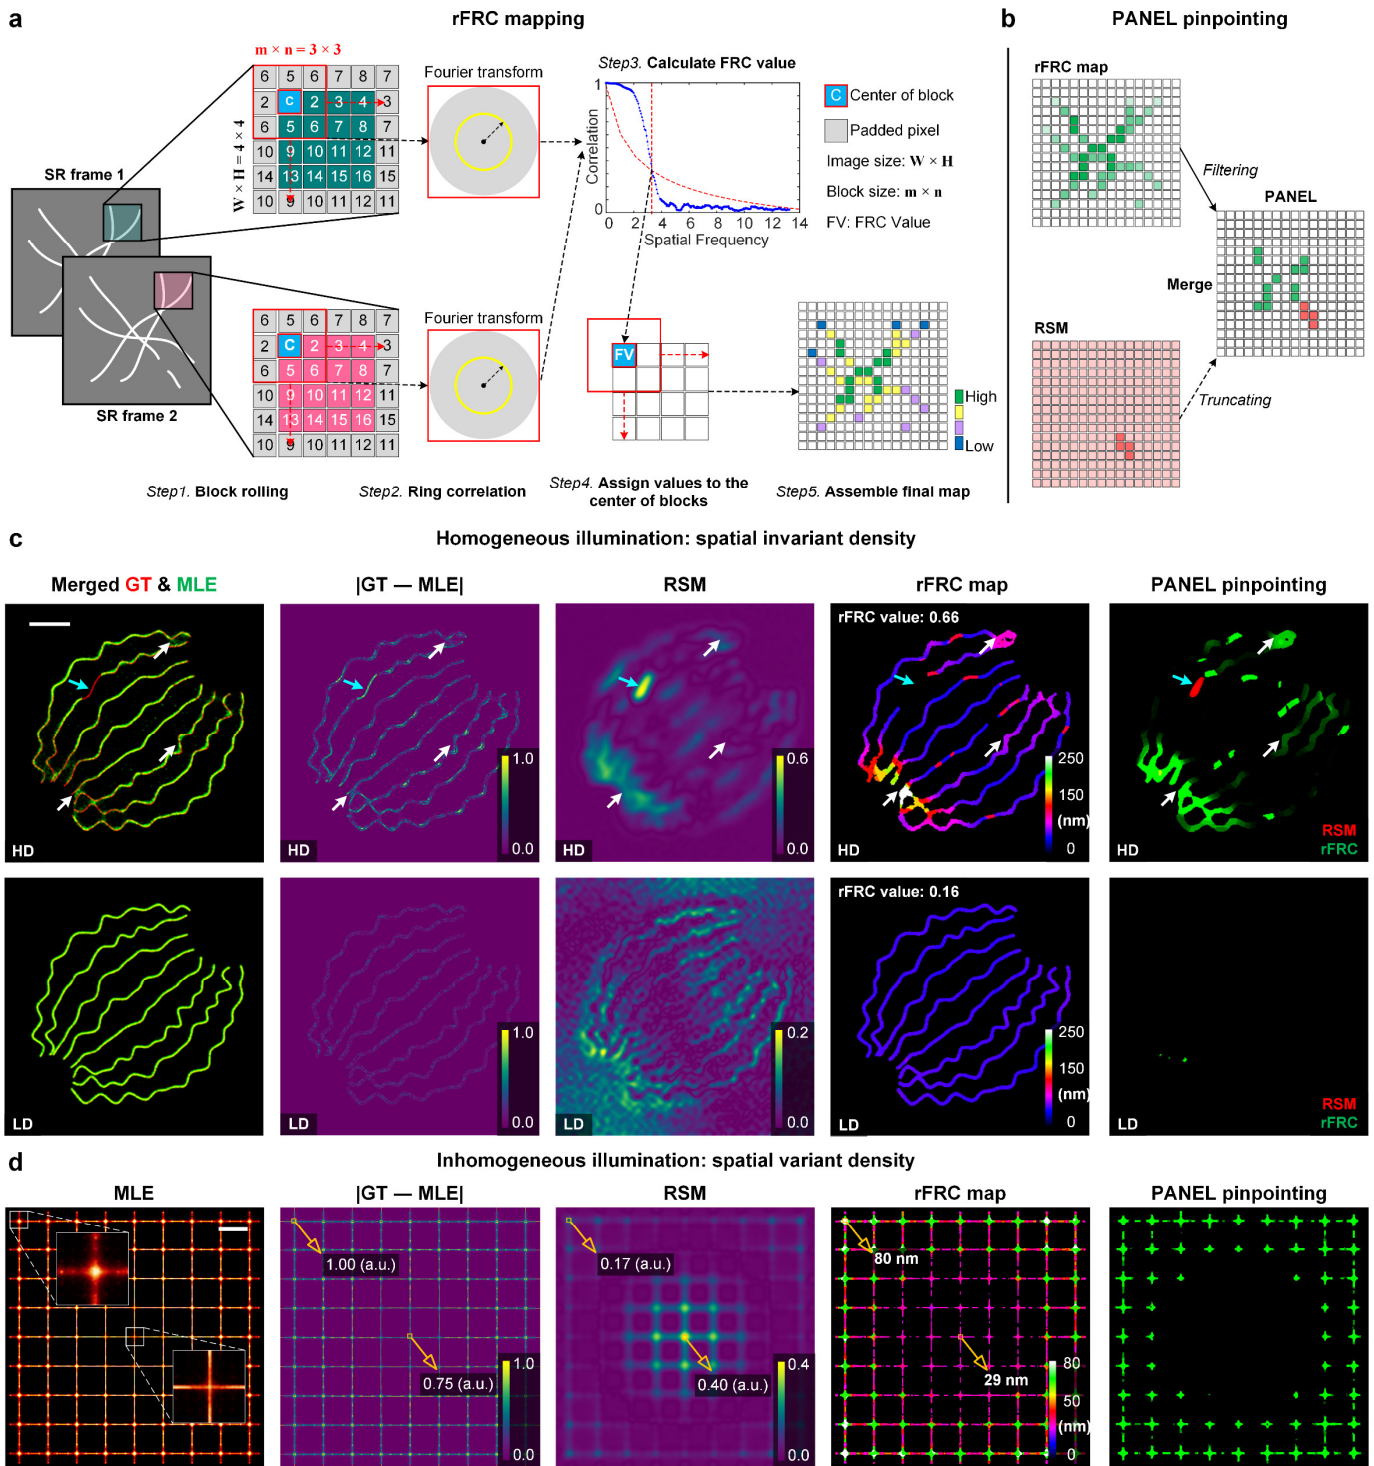

947

948

949

950

951

952

953

954

955

**Fig. 1 | Overview of rFRC mapping and PANEL pinpointing.** (a, b) Workflows. (a) The workflow of the rFRC map. **Step 1**, the symmetrically padded (gray pixels) two input images are clipped to small subsets for FRC calculation. The center pixel with an intensity lower than the background threshold will be skipped; otherwise, the following Steps 2-5 will be executed. **Steps 2-3**, FRC calculation, ring correlation in Fourier domain (Step 2), and FRC resolution determination (Step 3). **Step 4**, assign the obtained FRC resolutions to the corresponding center pixels. **Step 5**, assemble the final rFRC map and render it with the corresponding color map. (b) PANEL pinpointing. To highlight regions with low reliability, the rFRC map with values under the Otsu-determined threshold; and the normalized RSM with values under 0.5 will be filtered. Its abstract



956 version can be seen in **Supplementary Fig. 1. (c, d) Validations.** (c) Simulations of 2D-SMLM with  
957 homogeneous illumination (inducing overall spatial invariant active density), with high-density ('HD', top)  
958 and low-density ('LD', bottom) emitting fluorophores in each frame. From left to right: Merged MLE  
959 reconstructions (green channel) and ground-truth images (red channel); Spatial subtractions between ground-  
960 truth images and MLE reconstructions; Spatial subtractions between wide-field ground-truth images and wide-  
961 field images generated from the MLE reconstructions, a.k.a. the RSM; The rFRC maps of two MLE  
962 reconstructions from odd frames ( $MLE_{\text{odd}}$ ) and even frames ( $MLE_{\text{even}}$ ), respectively; The full PANEL  
963 visualizations (RSM corresponding to the red channel and rFRC map to the green channel). Cyan and white  
964 arrows represent the errors found by the RSM or rFRC map, respectively. (d) 2D-SMLM simulation with  
965 inhomogeneous illumination (high intensity in the center and decreasing illumination toward the edges). From  
966 left to right: The MLE result; Spatial subtraction between ground-truth image and MLE result; The RSM; The  
967 rFRC map. Scale bars: (c) 500 nm; (d) 1  $\mu\text{m}$ .

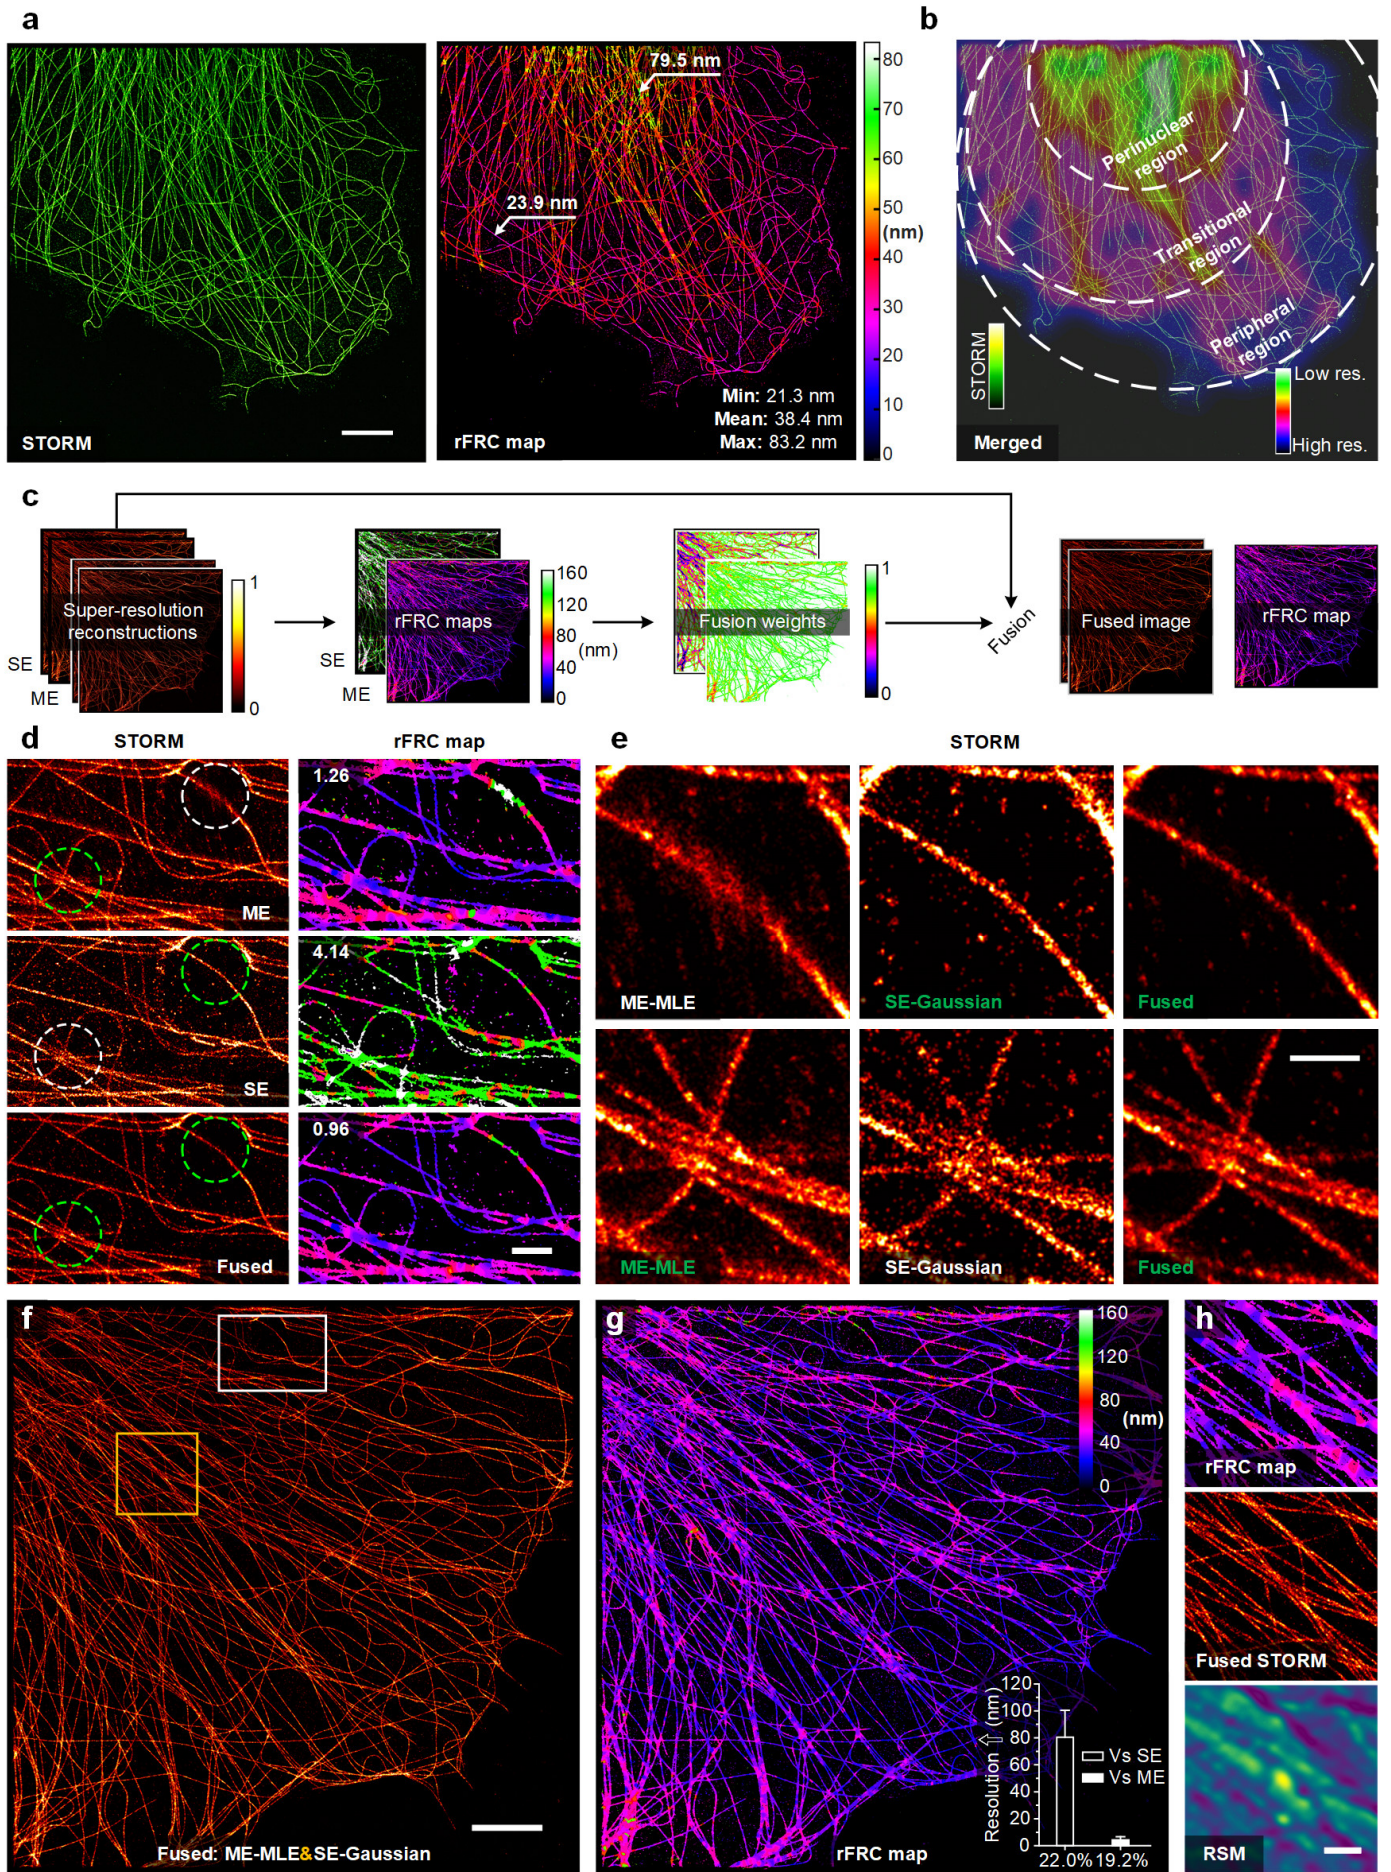



969 **Fig. 2 | Evaluation and optimal fusion of STORM using the rFRC map. (a)** STORM result of  $\alpha$ -tubulin  
970 labeled with Alexa Fluor 647 in a COS-7 cell (left) and its rFRC map (right). **(b)** The merged view of STORM  
971 result (green hot) and Gaussian averaged rFRC map (shifted jet), highlighting the three-stage distribution. **(c)**  
972 Schematic of the STORM fusion. 'ME': Multi-emitter MLE result; 'SE': single-emitter Gaussian fitting result.  
973 **(d)** STORM results (COS-7 cells,  $\alpha$ -tubulin labeled with Alexa Fluor 647, left) and their rFRC maps (right)  
974 are shown from top to bottom, which are magnified views of the white box in **(f)**. From top to bottom: 'ME'  
975 result; 'SE' result; the fused result from the 'ME' and 'SE' reconstructions. The corresponding rFRC values are  
976 marked on the top left of the rFRC maps. **(e)** Magnified views of the dashed circles in **(c)**. **(f)** The entire view  
977 of the fused STORM result (COS-7 cells,  $\alpha$ -tubulin labeled with Alexa Fluor 647). **(g)** rFRC map of **(f)**. The  
978 inset shows the improved resolution achieved by fusion compared with the SE ( $80.55 \pm 1.52$  nm at 22.0%  
979 region, hollow) and ME ( $4.28 \pm 0.14$  nm at 19.2% region, white solid) results. **(h)** Enlarged regions enclosed  
980 by the yellow box in **(f)**. The results of the rFRC map, fused STORM, and RSM are shown from top to bottom.  
981 Error bars, s.e.m.; res.: resolution; scale bars: **(a, f)** 5  $\mu$ m; **(d, e)** 500 nm; **(h)** 1  $\mu$ m.

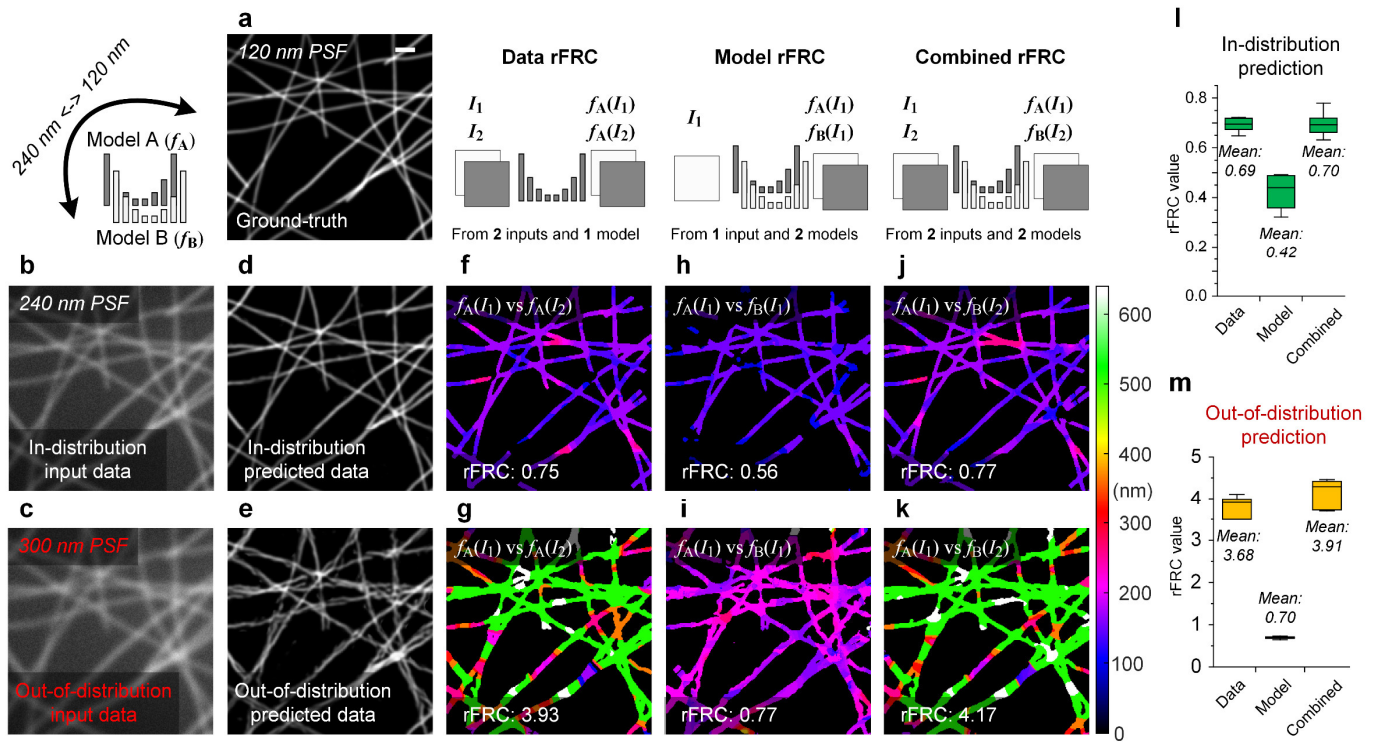

**Fig. 3 | Data and model uncertainty quantifications of learning-based restoration.** (a) The synthetic tubulin structures were convoluted with a 120 nm PSF and down-sampled 2 times (pixel size 40 nm) as ground truth. (b) The structures were convoluted with a 240 nm PSF, and down-sampled 2 times before adding 10% Gaussian noise to be the training dataset and in-distribution test image. (c) The structures were convoluted with a 300 nm PSF, and down-sampled 2 times before adding 10% Gaussian noise to be the out-of-distribution test image. (d, e) The network predictions of in-distribution input (d, rFRC value: 0.75; rFRC resolution: 161.0 nm), and out-of-distribution input (e, rFRC value: 3.93; rFRC resolution: 453.2 nm). (f, g) The 'Data rFRC' maps of two predictions from two in-distribution inputs (f), and two out-of-distribution inputs (g). (h, i) The 'Model rFRC' maps of two model predictions from in-distribution input (h, rFRC value: 0.56; rFRC resolution: 143.2 nm), and out-of-distribution input (i, rFRC value: 0.77; rFRC resolution: 203.2 nm). (j, k) The 'Combined rFRC' maps of two model predictions from two in-distribution inputs (j, rFRC value: 0.77; rFRC resolution: 163.0 nm), and out-of-distribution inputs (k, rFRC value: 4.17; rFRC resolution: 475.6 nm). (l, m) rFRC values of in-distribution and out-of-distribution predictions. Scale bar: (a) 1  $\mu$ m.

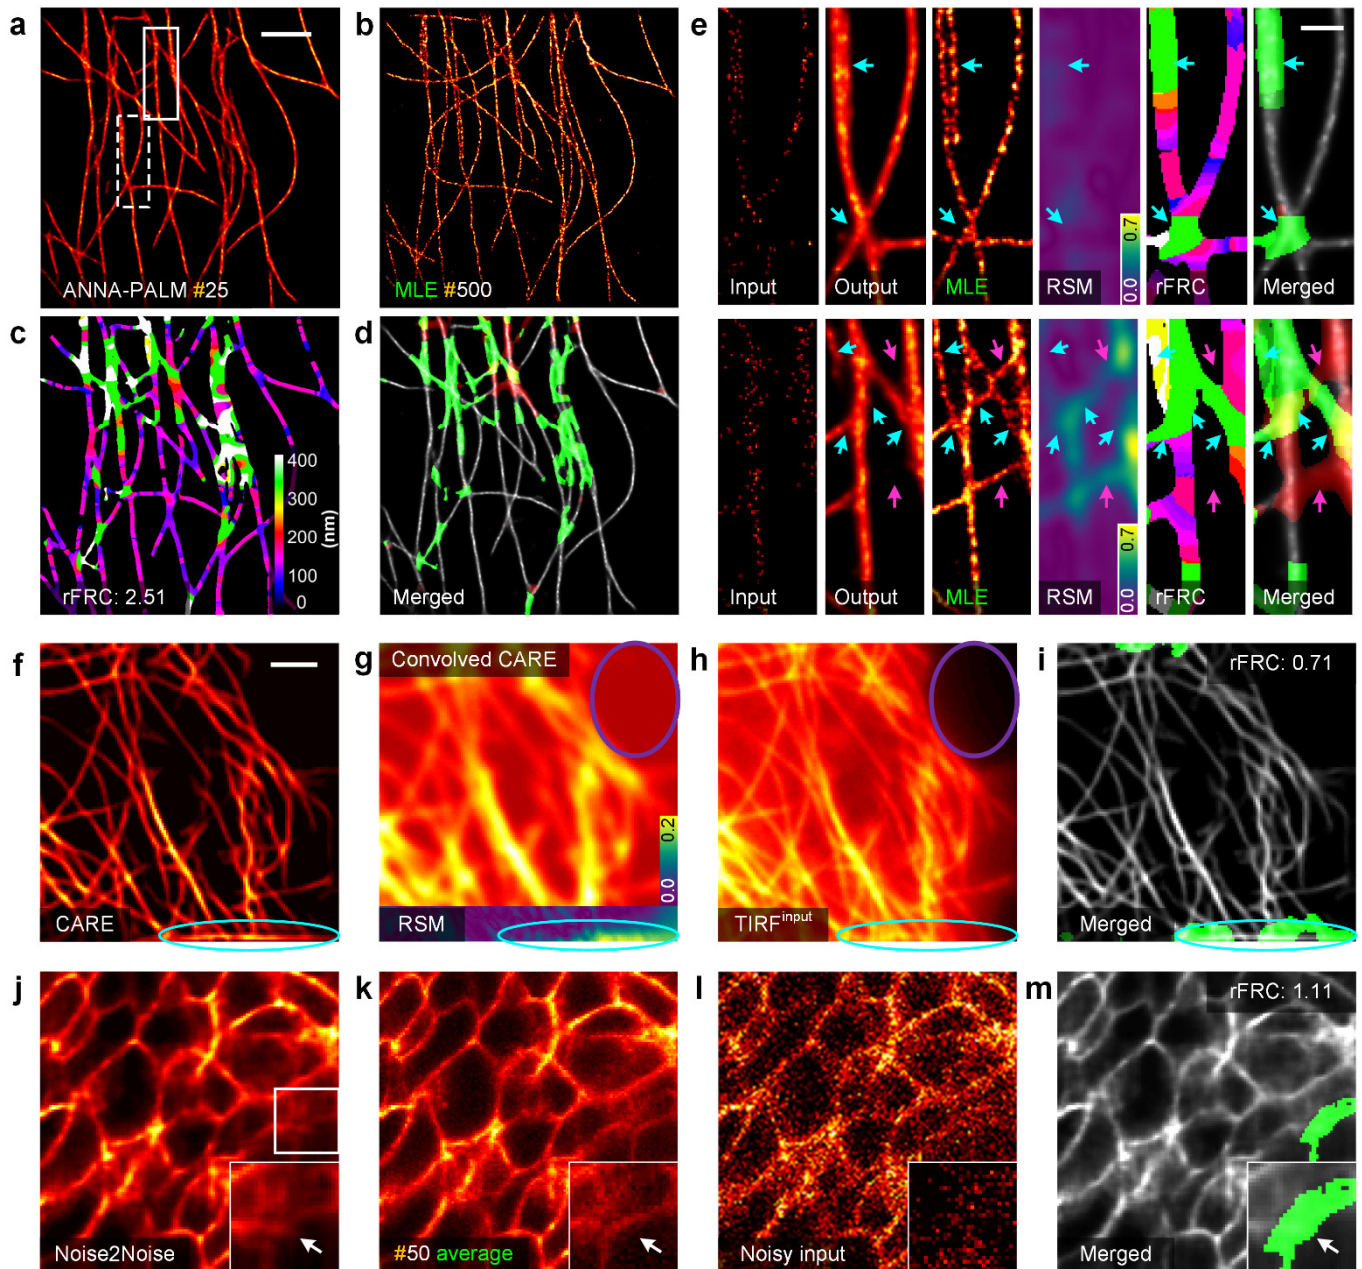

**Fig. 4 | Assessments of diverse learning-based reconstructions.** (a) ANNA-PALM output (MLE reconstruction with 25 frames of tubulin as input). (b) MLE reconstruction with full 500 frames. (c) rFRC map of (a). (d) Merged image of the PANEL (green channel) and ANNA-PALM (gray channel) results. (e) From left to right: Enlarged regions of input sparse MLE reconstruction, ANNA-PALM output, full dense MLE reconstruction, RSM, rFRC map, and merged PANEL visualization map from the white solid (top) and dashed (bottom) box in (a). Cyan and magenta arrows represent the errors detected by rFRC and RSM, respectively. (f) CARE output of GFP-tagged microtubules in live HeLa cells (raw TIRF image as input). (g) CARE convolved back to its original low-resolution scale (top) and its RSM (bottom) result. (h) Corresponding TIRF image. (i) Merged image of the PANEL (green channel) and CARE (gray channel) results. (j) Noise2Noise result of EGFP-labeled *Tg (sox10:megfp)* zebrafish at 2 days postfertilization. (k) Ground-truth reference image generated by averaging 50 noise images with identical content. (l) Representative noisy input. (m) Merged image of PANEL (green channel) and Noise2Noise (gray channel) results. Centerline, medians; limits, 75% and 25%; whiskers, maximum and minimum; error bars, s.e.m.; scale bars: (a, f) 2  $\mu$ m (c) 500 nm.
